# Supplementary material for: Mapping epigenetic changes to the host cell genome induced by Burkholderia pseudomallei reveals pathogen-specific and pathogen-generic signatures of infection
Source: PubMed Central journal article supplement (PMC4971488; doi:10.1038/srep30861), 2016-08-03
Supplement: srep30861-s1.pdf [file srep30861-s1.pdf]

Mapping epigenetic changes to the host cell genome induced by *Burkholderia pseudomallei* reveals pathogen-specific and pathogen-generic signatures of infection.

Deniz Cizmeci<sup>1,+</sup>, Emma L. Dempster<sup>2,+</sup>, Olivia L. Champion<sup>3</sup>, Sariqa Wagley<sup>3</sup>, Ozgur E. Akman<sup>1</sup>, Joann L. Prior<sup>3</sup>, Orkun S. Soyer<sup>4,\*</sup>, Jonathan Mill<sup>2,5,\*</sup>, Richard W. Titball<sup>3,\*</sup>.

<sup>1</sup> College of Engineering, Mathematics and Physical Sciences, University of Exeter, Exeter, United Kingdom

<sup>2</sup> University of Exeter Medical School, Exeter University, Exeter, United Kingdom

<sup>3</sup> College of Life and Environmental Sciences, University of Exeter, Exeter, United Kingdom

<sup>4</sup> School of Life Sciences, University of Warwick, United Kingdom

<sup>5</sup> Institute of Psychiatry, Psychology & Neuroscience, King's College London, United Kingdom

<sup>+</sup>These authors contributed equally to this work

<sup>\*</sup>Corresponding authors

## Supporting Information

**Supplementary Figure 1. The proportion (74%) of cells infected at T2 determined by microscopy.**

**Supplementary Figure 2. Experimental design.**

**Supplementary Table 1. Replicated infection induced differentially methylated probes (iDMPs). (A) iDMPs replicating at T2. (B) iDMPs replicating at T4.**

**Supplementary Figure 3. Methylation changes in experiments 1 and 2, at replicated iDMPs. (A) Changes at T2. (B) Changes at T4.**

**Supplementary Table 2. iDMPs by genomic feature**

**Supplementary Figure 4. Methylation levels in *M. tuberculosis* and *B. pseudomallei* infections at conserved iDMPs in *B. pseudomallei* infection. (A) *B. pseudomallei* infection at T2. (B) *B. pseudomallei* infection at T4.**

**Supplementary Table 3. Comparison with publically available DNA methylation changes during infection with *M. tuberculosis*. Genes annotated to the iDMPs in *B. pseudomallei* and in *M. tuberculosis* infections.**

**Supplementary Table 4. Comparison with publically available transcription data. Genes annotated to conserved iDMPs in our study and differentially expressed in patients with septicemic melioidosis.**

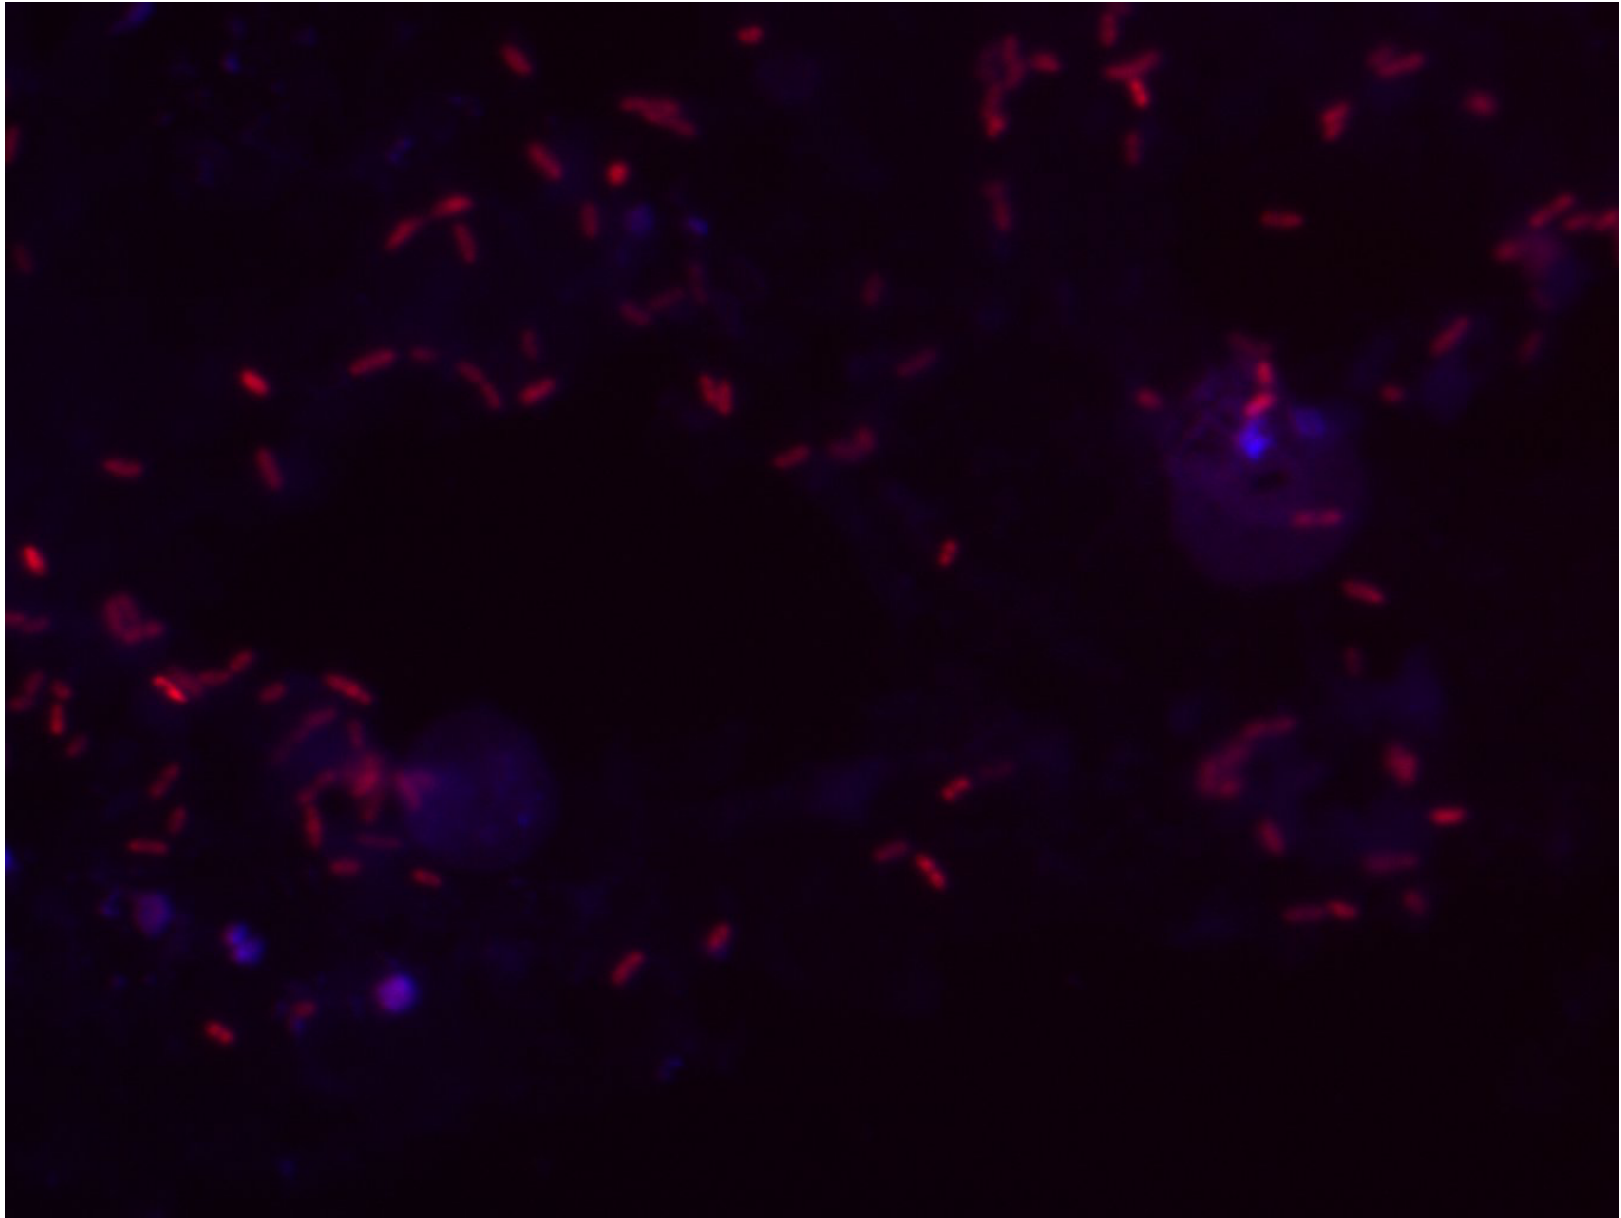

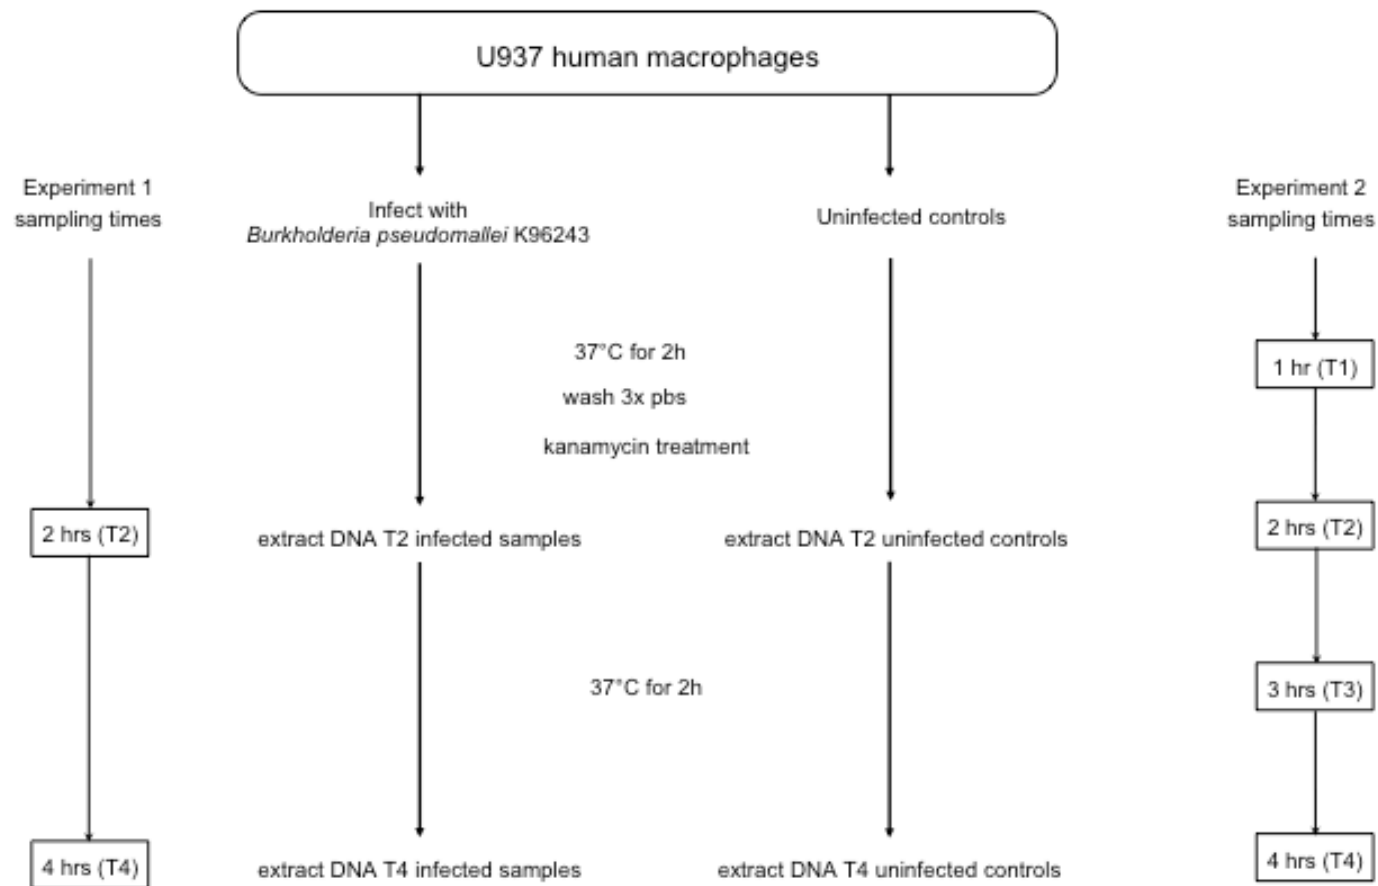

a

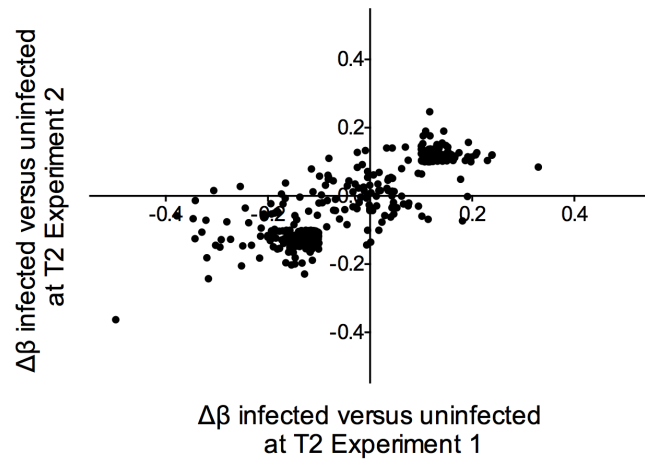

b

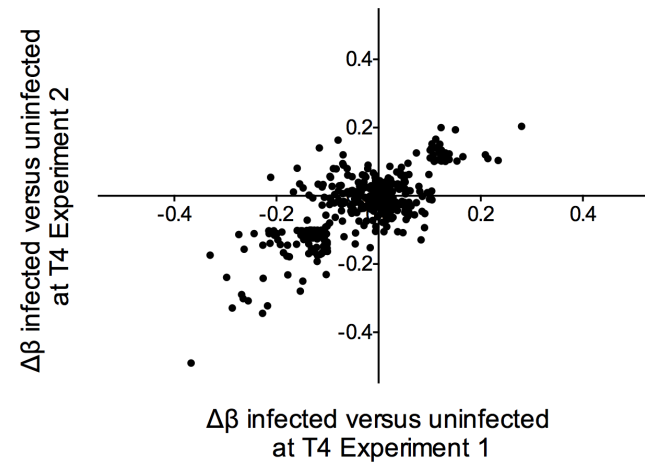

a

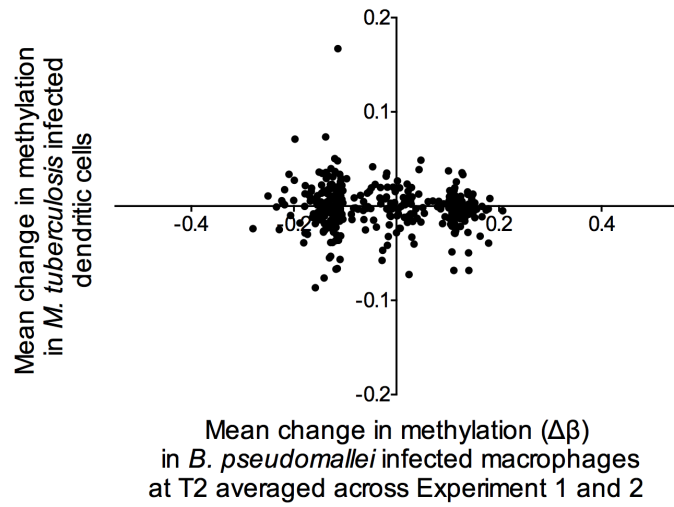

b

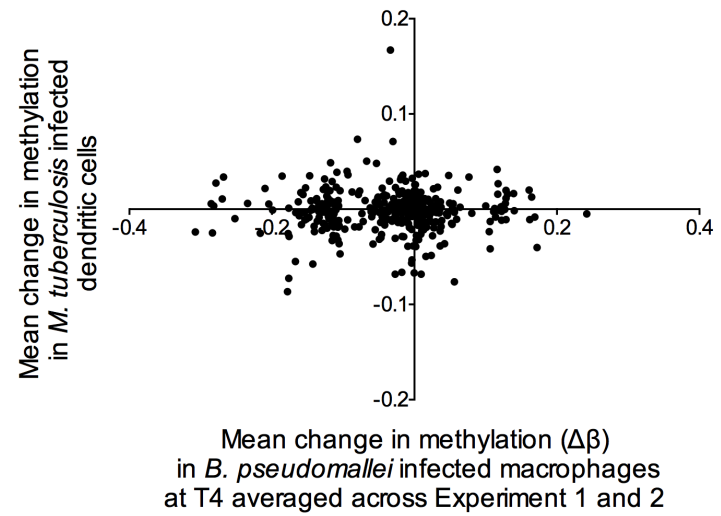

**Supplementary Table 1. (A)** Replicated infection induced differentially methylated probes (IDMPs) at T2 in infected versus uninfected human macrophages.

| Probe      | Gene annotation using GREAT              | Chromosome (chr) | Methylation sites and annotation |                          | UCSC CPG ISLANDS NAME | RELATION TO UCSC CPG ISLAND | Transcription Factor Binding Site Annotation | DHS Annotation     | Methylation level differences ( $\Delta\beta$ )          |                                                          |                                                          |                                                          |                                                          |                                                          | Differential methylation pattern    |                                     |
|------------|------------------------------------------|------------------|----------------------------------|--------------------------|-----------------------|-----------------------------|----------------------------------------------|--------------------|----------------------------------------------------------|----------------------------------------------------------|----------------------------------------------------------|----------------------------------------------------------|----------------------------------------------------------|----------------------------------------------------------|-------------------------------------|-------------------------------------|
|            |                                          |                  | UCSC REFGENE NAME                | UCSC REFGENE GROUP       |                       |                             |                                              |                    | $\Delta\beta$ T2 infected versus uninfected Experiment 1 | $\Delta\beta$ T4 infected versus uninfected Experiment 1 | $\Delta\beta$ T1 infected versus uninfected Experiment 2 | $\Delta\beta$ T2 infected versus uninfected Experiment 2 | $\Delta\beta$ T3 infected versus uninfected Experiment 2 | $\Delta\beta$ T4 infected versus uninfected Experiment 2 |                                     |                                     |
| cg00048832 | GABRA1 (-2760)                           | 5                | 161274631                        | GABRA1                   | TSS1500               |                             | NRSF                                         | 1                  | 0.11717813                                               | 0.03438222                                               | -0.004404                                                | 0.24730848                                               | -0.04483397                                              | -0.0187379                                               | transient response hypermethylation |                                     |
| cg07938480 | OR1F2P (-333)                            | 16               | 3265228                          | OR1F2P                   | TSS1500               |                             | NA                                           | 0                  | 0.14438473                                               | 0.00016213                                               | -0.053704                                                | 0.19016031                                               | 0.02443694                                               | -0.0330175                                               | oscillatory response                |                                     |
| cg18831045 | CDC25C (-474)                            | 5                | 137667989                        | CDC25C                   | TSS1500;TSS1500       | chr5:137667502-137668037    | Island                                       | Pol2 HEY1 HDAC2_   | 0                                                        | 0.10938888                                               | -0.0951329                                               | 0.03132455                                               | 0.18977628                                               | -0.0129569                                               | -0.0069658                          | transient response hypermethylation |
| cg00758915 | PCDHGC5 (-95268), TAF7 (-71389)          | 5                | 140773539                        | PCDHGA4                  | Body                  | chr5:140773855-140774441    | N_Shore                                      | NA                 | 0                                                        | 0.10448559                                               | 0.0511167                                                | 0.10033766                                               | 0.17685855                                               | 0.02970327                                               | -0.019112                           | early response hypermethylation     |
| cg27621528 | GPC1 (+17503), ANKMY1 (+104787)          | 2                | 241392617                        | PP14571;GP               | Body;Body             | chr2:241391876-241393598    | Island                                       | Pol2               | 0                                                        | 0.11781393                                               | -0.1058362                                               | 0.19486726                                               | 0.17622012                                               | -0.1305379                                               | -0.1199211                          | oscillatory response                |
| cg04133410 | PTCH1 (-1127)                            | 9                | 98271957                         | PTCH1;PTCH               | TSS1500;Body;Body     | chr9:98272643-98273383      | N_Shore                                      | HA-E2F1 In1        | 1                                                        | 0.19250076                                               | 0.0707561                                                | 0.02616392                                               | 0.15754276                                               | 0.03533834                                               | -0.0551208                          | oscillatory response                |
| cg21860629 | LOR (+2090), PGLYRP3 (+48925)            | 1                | 153234268                        | LOR                      | Body                  |                             | NA                                           | 0                  | 0.14119877                                               | -0.1010378                                               | -0.0797033                                               | 0.1557244                                                | -0.0537203                                               | -0.0436497                                               | oscillatory response                |                                     |
| cg10648547 | PASK (+37110), SNED1 (+113554)           | 2                | 242051808                        | PASK                     | Body                  |                             | NA                                           | 0                  | 0.10361568                                               | -0.0466902                                               | -0.0842519                                               | 0.15372391                                               | 0.06048216                                               | -0.0091283                                               | oscillatory response                |                                     |
| cg27359566 | ZFX3 (-15901)                            | 16               | 73098174                         |                          |                       | chr16:73099812-73100791     | N_Shore                                      | BAF155 In1 Pol2 S  | 1                                                        | 0.13136858                                               | 0.02813195                                               | 0.0827783                                                | 0.15060233                                               | 0.05084654                                               | -0.0055484                          | early response hypermethylation     |
| cg12450347 | TRIM67 (-122695), ARV1 (+61156)          | 1                | 231175978                        | FAM89A;FAN5'UTR;1stExon  |                       | chr1:231175062-231176317    | Island                                       | HMG3 CCNT2 Pol     | 1                                                        | 0.13260386                                               | -0.1544563                                               | 0.03544483                                               | 0.14944668                                               | -0.0782559                                               | 0.03533962                          | oscillatory response                |
| cg22829908 | MLLT10 (-9107), C10orf140 (-7716)        | 10               | 21814466                         | C10orf140                | 5'UTR                 | chr10:21814786-21815716     | N_Shore                                      | Pol2 HDAC2_[SC-62  | 1                                                        | 0.14890323                                               | 0.01721991                                               | -0.0210929                                               | 0.14808498                                               | -0.0019222                                               | 0.02236006                          | transient response hypermethylation |
| cg20429250 | SLFN12L (+398)                           | 17               | 33814359                         | SLFN12L                  | Body                  | chr17:33814234-33814947     | Island                                       | Pol2 SUZ12 Egr-1 Y | 1                                                        | 0.10048839                                               | -0.0687821                                               | -0.0058796                                               | 0.14666333                                               | -0.1130169                                               | 0.09002075                          | oscillatory response                |
| cg13499210 | DMRT2 (-55040), DMRT3 (+18616)           | 9                | 995579                           |                          |                       | chr9:998463-999034          | N_Shelf                                      | NA                 | 0                                                        | 0.15241536                                               | -0.0210323                                               | 0.2256893                                                | 0.14317592                                               | 0.03266068                                               | 0.08060678                          | oscillatory response                |
| cg11359849 | NAV3 (-506491), E2F7 (-259218)           | 12               | 77718577                         |                          |                       | chr12:77718453-77719440     | Island                                       | CTCF ZNF263 Rad2:  | 1                                                        | 0.13521272                                               | 0.01389413                                               | 0.00346657                                               | 0.14050885                                               | -0.0208686                                               | 0.00759996                          | transient response hypermethylation |
| cg14097425 | MTAP (-243083), IFNE (-77240)            | 9                | 21559551                         | LOC554202                | Body                  | chr9:21559133-21559816      | Island                                       | Pol2-4H8 Pol2      | 0                                                        | 0.12670867                                               | -0.0881664                                               | -0.0279221                                               | 0.13853684                                               | 0.06558034                                               | 0.08028452                          | late response hypermethylation      |
| cg10445453 | ADAMTS14 (-18)                           | 10               | 72432540                         | ADAMTS14;#TSS200;TSS200  |                       | chr10:72432242-72432738     | Island                                       | TBP E2F6 CCNT2 H   | 0                                                        | 0.12978727                                               | -0.073589                                                | -0.0281042                                               | 0.13851049                                               | 0.00926703                                               | -0.0233771                          | transient response hypermethylation |
| cg05999550 | ABCC3 (-315)                             | 17               | 48711902                         | ABCC3;ABCC               | TSS1500;TSS1500       | chr17:48712050-48712705     | N_Shore                                      | USF-1 JunD TBP     | 1                                                        | 0.10195109                                               | 0.05960762                                               | -0.0046199                                               | 0.13766617                                               | 0.00134074                                               | -0.0477932                          | transient response hypermethylation |
| cg16919456 | ARHGAP28 (+95359), LAMA1 (+188022)       | 18               | 6929790                          |                          |                       | chr18:6929450-6930088       | Island                                       | E2F6 Pol2 E2F6_(H  | 0                                                        | 0.11850093                                               | -0.0485952                                               | -0.0317444                                               | 0.13759857                                               | 0.01898528                                               | -0.04157                            | transient response hypermethylation |
| cg25759517 | PCYR1 (-39)                              | 17               | 79895006                         | PCYR1;PCYR1TSS200;TSS200 |                       | chr17:79894668-79895533     | Island                                       | Pol2 Pol2-4H8      | 0                                                        | 0.11531041                                               | -0.0208348                                               | -0.0584653                                               | 0.13739596                                               | -0.0011366                                               | -0.0317414                          | oscillatory response                |
| cg00886554 | NMU (-134)                               | 4                | 56502598                         | NMU                      | TSS200                | chr4:56501912-56502523      | S_Shore                                      | ZNF263 HMG3 H2F    | 0                                                        | 0.10044113                                               | -0.0769912                                               | 0.05489736                                               | 0.13738244                                               | 0.02651348                                               | 0.02976454                          | early response hypermethylation     |
| cg17351085 | RAB31L1 (-261)                           | 11               | 61685257                         | RAB31L1                  | TSS1500               | chr11:61684591-61685216     | S_Shore                                      | Pol2 CCNT2 HA-E2F  | 1                                                        | 0.10593022                                               | 0.01717758                                               | -0.0216726                                               | 0.13434846                                               | -0.0561155                                               | -0.036464                           | oscillatory response                |
| cg12149313 | DOCK10 (-277)                            | 2                | 225907606                        | DOCK10                   | TSS1500               | chr2:22590653-225907464     | S_Shore                                      | NA                 | 0                                                        | 0.10755443                                               | -0.0051723                                               | -0.0378797                                               | 0.13281484                                               | -0.0567207                                               | 0.01905603                          | oscillatory response                |
| cg24479328 | SVT1 (+277250), PAWR (+368107)           | 12               | 79716682                         | SVT1;SVT1;SV             | Body;Body             |                             | NA                                           | 0                  | 0.11859595                                               | 0.01993023                                               | -0.027586                                                | 0.13271221                                               | -0.0559396                                               | -0.0087045                                               | oscillatory response                |                                     |
| cg08780020 | KIAA1826 (+73)                           | 11               | 105892880                        | KIAA1826;KI              | 1stExon;5'UTR         | chr11:105892725-105892952   | Island                                       | Pol2 Pol2-4H8 TAF1 | 1                                                        | 0.11653229                                               | -0.0028006                                               | -0.0803286                                               | 0.13166866                                               | -0.055295                                                | 0.02041831                          | oscillatory response                |
| cg11422541 | ADCY6 (-4710)                            | 12               | 49182586                         | ADCY6                    | 5'UTR                 | chr12:49182421-49182658     | Island                                       | CTBP2              | 1                                                        | 0.1025179                                                | 0.05299174                                               | -0.0316565                                               | 0.131506                                                 | 0.00882527                                               | 0.05969353                          | oscillatory response                |
| cg17629148 | B4GALNT2 (-96732), IGF2BP1 (+38823)      | 17               | 47113596                         | IGF2BP1;IGF              | Body;Body             | chr17:47113256-47113490     | S_Shore                                      | CTCF YY1_[C-20] R  | 1                                                        | 0.15273946                                               | -0.0241888                                               | -0.0169474                                               | 0.13031161                                               | -0.0103382                                               | -0.0294233                          | transient response hypermethylation |
| cg14701410 | SLC4A8 (+88)                             | 12               | 51818681                         | SLC4A8;SLC4              | 5'UTR;1stExon;5'UTR   | chr12:51818460-51819166     | Island                                       | HA-E2F1 SP1 Nrf1   | 1                                                        | 0.12747347                                               | -0.0706298                                               | -0.055611                                                | 0.12857304                                               | -0.1357131                                               | -0.0733548                          | oscillatory response                |
| cg18453320 | FOXC1 (+5429), GMD5 (+629758)            | 6                | 1616109                          |                          |                       | chr6:1604606-1615866        | S_Shore                                      | NA                 | 1                                                        | 0.12124919                                               | -0.0720421                                               | 0.08740539                                               | 0.12846703                                               | 0.02386151                                               | -0.024473                           | early response hypermethylation     |
| cg11630696 | ROBO1 (-275)                             | 3                | 79817333                         | ROBO1                    | TSS1500               | chr3:79815638-79815900      | S_Shore                                      | USF-1              | 0                                                        | 0.1041885                                                | -0.0073323                                               | 0.07984858                                               | 0.12756229                                               | 0.0908929                                                | 0.02593736                          | early response hypermethylation     |
| cg13959031 | GOLM1 (-181831), ISCA1 (+1149)           | 9                | 88896340                         | ISCA1                    | Body                  | chr9:88896741-88897721      | N_Shore                                      | NA                 | 1                                                        | 0.17437589                                               | -0.0143422                                               | -0.0118611                                               | 0.12715938                                               | 0.06327891                                               | 0.02995745                          | transient response hypermethylation |
| cg12077581 | PANX2 (-14)                              | 22               | 50609145                         | PANX2                    | TSS200                | chr22:50609181-50609627     | N_Shore                                      | Pol2 YY1_[C-20] E2 | 1                                                        | 0.20949518                                               | 0.08578358                                               | 0.00858517                                               | 0.12707931                                               | 0.0205424                                                | -0.0009785                          | transient response hypermethylation |
| cg26127652 | ZNF311 (-392)                            | 6                | 28973426                         | ZNF311                   | TSS1500               |                             | NA                                           | 1                  | 0.1047759                                                | 0.00998849                                               | -0.0012336                                               | 0.12508459                                               | 0.02251254                                               | 0.03874274                                               | transient response hypermethylation |                                     |
| cg10982775 | FKBP14 (-1525), PLEKHA8 (-184)           | 7                | 30067792                         | PLEKHA8                  | TSS1500               | chr7:30067762-30068600      | Island                                       | Pol2 Pol2-4H8 TBP  | 1                                                        | 0.10584576                                               | -0.0429999                                               | 0.00913856                                               | 0.12471956                                               | -0.0199121                                               | 0.00260347                          | transient response hypermethylation |
| cg06123396 | ADAM23 (-745)                            | 2                | 207307622                        | ADAM23                   | TSS1500               | chr2:207308266-207308907    | N_Shore                                      | CTCF Rad21 CTCF_(  | 1                                                        | 0.13736652                                               | -0.1100788                                               | 0.03384137                                               | 0.12459717                                               | 0.03256633                                               | 0.02645456                          | transient response hypermethylation |
| cg20783424 | OR6B3 (-90794), OTOS (+3790)             | 2                | 241076282                        | MYEOV2                   | TSS1500               | chr2:241075403-241075916    | S_Shore                                      | USF-1              | 0                                                        | 0.13143364                                               | 0.05016444                                               | -0.1086484                                               | 0.1245402                                                | 0.06621623                                               | 0.04656665                          | oscillatory response                |
| cg05917480 | SIAH1 (+49308), LONP2 (+91710)           | 16               | 48369920                         | LONP2                    | Body                  |                             | NA                                           | 1                  | 0.1005494                                                | 0.04056847                                               | 0.06610939                                               | 0.12414076                                               | -0.0054632                                               | 0.01943434                                               | early response hypermethylation     |                                     |
| cg21241989 | DMRT1 (-2563)                            | 9                | 839126                           |                          |                       | chr9:841374-843364          | N_Shelf                                      | NA                 | 0                                                        | 0.15490349                                               | 0.03694635                                               | -0.0760828                                               | 0.12385576                                               | 0.09321498                                               | -0.0297705                          | oscillatory response                |
| cg21084674 | IGFL2 (+54)                              | 19               | 46651553                         | IGFL2;IGFL2              | 5'UTR;1stExon         |                             | NA                                           | 0                  | 0.13711127                                               | -0.0403403                                               | 0.03225464                                               | 0.12321111                                               | -0.0139034                                               | 0.00378373                                               | transient response hypermethylation |                                     |
| cg01493198 | SFB314 (-247)                            | 2                | 24299560                         | SFB314                   | TSS1500               | chr2:24300060-24300294      | N_Shore                                      | Pol2 ZEB1_[SC-253E | 1                                                        | 0.15622208                                               | -0.0692783                                               | -0.0149065                                               | 0.1227938                                                | 0.03188912                                               | 0.12026438                          | oscillatory response                |
| cg08341316 | DKK2 (+497)                              | 4                | 107956955                        | DKK2;DKK2                | 1stExon;5'UTR         | chr4:107956555-107957453    | Island                                       | NA                 | 1                                                        | 0.14555732                                               | 0.09590551                                               | -0.0173348                                               | 0.12155373                                               | -0.072205                                                | 0.01008008                          | oscillatory response                |
| cg19187155 | NMUR1 (-88)                              | 2                | 232395269                        | NMUR1                    | TSS200                | chr2:232394763-232395337    | Island                                       | CTCF ELF1_[SC-631] | 1                                                        | 0.15892428                                               | -0.1477815                                               | 0.00993544                                               | 0.12146488                                               | -0.1348922                                               | 0.02335672                          | oscillatory response                |
| cg01458686 | NAV3 (-506232), E2F7 (-259477)           | 12               | 77718836                         |                          |                       | chr12:77718453-77719440     | Island                                       | ZNF263 HA-E2F1 T   | 0                                                        | 0.10649671                                               | 0.06403109                                               | 0.00390909                                               | 0.12130652                                               | 0.04765915                                               | -0.030135                           | transient response hypermethylation |
| cg18429742 | ZDHC11 (-1)                              | 5                | 851101                           | ZDHC11                   | TSS200                | chr5:848389-848770          | S_Shelf                                      | NA                 | 0                                                        | 0.23904046                                               | 0.05147398                                               | 0.05675269                                               | 0.12029914                                               | 0.08628349                                               | -0.0478795                          | early response hypermethylation     |
| cg17400701 | GBX2 (+237384), AGAP1 (+436535)          | 2                | 236839267                        | AGAP1;AGAP               | Body;Body             |                             | NA                                           | 0                  | 0.20673595                                               | 0.02194219                                               | -0.0506624                                               | 0.12013028                                               | -0.0587245                                               | -0.0097848                                               | oscillatory response                |                                     |
| cg04134305 | SHH (-828554), RNF32 (-2150), C7orf13 (- | 7                | 156433520                        | C7orf13;RNF              | TSS200;5'UTR          | chr7:156432433-156433670    | Island                                       | Pol2 AP-2gamma E   | 0                                                        | 0.23877902                                               | 0.0211124                                                | -0.0508012                                               | 0.11940984                                               | -0.000888                                                | 0.03273807                          | oscillatory response                |
| cg12788747 | YD (-142073), PPP1R14C (+83767)          | 6                | 150547954                        | PPP1R14C                 | Body                  |                             | NA                                           | 0                  | 0.10620717                                               | -0.0353755                                               | 0.05489467                                               | 0.1193003                                                | 0.03472265                                               | -0.0226266                                               | early response hypermethylation     |                                     |
| cg01451328 | SIX1 (+1101), SIX6 (+139116)             | 14               | 61115053                         | SIX1                     | Body                  | chr14:61114102-61116552     | Island                                       | ZNF263 CTCF        | 1                                                        | 0.1662911                                                | 0.01576835                                               | 0.01962551                                               | 0.11672381                                               | -0.0457923                                               | -0.033998                           | transient response hypermethylation |
| cg12280664 | USP6NL (+256486), CELF2 (+257895)        | 10               | 11317787                         | CUGBP2                   | Body                  |                             | NA                                           | 0                  | 0.13458108                                               | -0.1061998                                               | 0.03037292                                               | 0.11509041                                               | 0.08853634                                               | -0.0039188                                               | transient response hypermethylation |                                     |
| cg22496973 | GCF2 (+575)                              | 2                | 75937535                         | C2orf3                   | Body                  | chr2:75937657-75938139      | N_Shore                                      | NA                 | 1                                                        | 0.11029574                                               | 0.0683844                                                | -0.0549359                                               | 0.11493467                                               | -0.0406286                                               | -0.0156716                          | oscillatory response                |
| cg09755105 | GBX1 (-121)                              | 7                | 150864987                        | GBX1                     | TSS200                | chr7:150863966-150865511    | Island                                       | NA                 | 0                                                        | 0.19145795                                               | -0.0534381                                               | -0.0806392                                               | 0.11491735                                               | 0.10754752                                               | 0.0109314                           | oscillatory response                |
| cg16048803 | KRT28 (-627)                             | 17               | 38956837                         | KRT28                    | TSS1500               | chr17:38953213-38953513     | S_Shelf                                      | P.U.1              | 0                                                        | 0.11533446                                               | 0.05218424                                               | 0.00162398                                               | 0.11469089                                               | 0.00524277                                               |                                     |                                     |

|            |                                     |    |           |              |                 |                           |                   |                     |            |            |            |            |            |            |             |                  |
|------------|-------------------------------------|----|-----------|--------------|-----------------|---------------------------|-------------------|---------------------|------------|------------|------------|------------|------------|------------|-------------|------------------|
| cg21966319 | PALLD (+124910), CBR4 (+388341)     | 4  | 169543126 | PALLD        | Body            |                           | p300 FOXA1_(C-20) | 1                   | 0.11508487 | -0.0699105 | 0.10473865 | 0.11453772 | 0.09493343 | 0.09499057 | constant    | hypermethylation |
| cg09247297 | LPHN2 (-322434)                     | 1  | 81943647  |              |                 |                           | NA                | 1                   | 0.11982751 | -0.0088022 | 0.03147702 | 0.11407225 | -0.0133453 | 0.01208146 | transient   | response         |
| cg18030105 | MGRPRE (-142622), ZNF195 (+4214)    | 11 | 3396237   | ZNF195       | Body            | chr11:3400155-3400419     | N_Shelf           | NA                  | 0          | 0.11763961 | -0.0063021 | 0.05274889 | 0.11294097 | -0.0428181 | 0.05411252  | oscillatory      |
| cg00782124 | KIF13B (-85908), DUSP4 (+1749)      | 8  | 29206517  | DUSP4;DUSP   | TSS200;Body     | chr8:29205664-29209847    | Island            | AP-2alpha AP-2gamma | 0          | 0.11514697 | 0.00784729 | 0.01836722 | 0.11276324 | -0.0063993 | 0.00122052  | transient        |
| cg18799217 | TMEM161B (-420925), MEF2C (+214332) | 5  | 87985589  |              |                 | chr5:87985470-87985810    | Island            | NANOG_(SC-33759)    | 1          | 0.11705066 | 0.01305151 | -0.0202127 | 0.11261346 | 0.01129624 | -0.0431408  | transient        |
| cg11280288 | PIK3R4 (+3560), COL6A6 (+182958)    | 3  | 130462135 | PIK3R4       | Body            | chr3:130465478-130465700  | N_Shelf           | NA                  | 0          | 0.11436854 | -0.1033761 | -0.0019844 | 0.11260043 | 0.01290173 | -0.0912962  | oscillatory      |
| cg06482188 | RBFOX3 (-165866), ENPP7 (-60336)    | 17 | 77644545  |              |                 |                           | NA                | 1                   | 0.14215359 | 0.04245372 | -0.0001969 | 0.1121966  | -0.0453547 | 0.0323716  | transient   |                  |
| cg11147094 | NTRK3 (+379523)                     | 15 | 88420438  | NTRK3        | Body            |                           | NA                | 0                   | 0.10449757 | 0.01955806 | -0.0474369 | 0.11212299 | -0.0081489 | 0.02300104 | transient   |                  |
| cg02130133 | ANOS (-918)                         | 11 | 22213803  | ANOS         | TSS1500         | chr11:22214172-22215320   | N_Shore           | CTCF                | 0          | 0.15897302 | -0.0102156 | -0.0047968 | 0.11210595 | -0.0225546 | 0.06773421  | oscillatory      |
| cg10639888 | RPRM (-47)                          | 2  | 154335368 | RPRM         | TSS200          | chr2:154334449-154335458  | Island            | HA-E2F1 ZNF263 Tf   | 1          | 0.10392143 | -0.0059547 | -0.0042461 | 0.11201817 | 0.03395487 | 0.03180807  | transient        |
| cg27326226 | GJB2 (-665)                         | 13 | 20767778  | GJB2         | TSS1500         | chr13:20766208-20767779   | Island            | NA                  | 0          | 0.13825075 | -0.0446411 | -0.0566395 | 0.1119594  | -0.0407747 | 0.01259072  | oscillatory      |
| cg14403184 | VENTX (-2199)                       | 10 | 135049208 |              |                 | chr10:135048797-135052077 | Island            | NA                  | 0          | 0.16582941 | -0.1184315 | 0.01727683 | 0.11187574 | -0.0587289 | 0.03411174  | oscillatory      |
| cg25767906 | SCP2 (-119)                         | 1  | 53392781  | SCP2         | TSS200          | chr1:53392880-53393645    | N_Shore           | E2F6_(H-50)         | 1          | 0.10956586 | -0.1590412 | -0.0144609 | 0.11119118 | -0.0654989 | 0.08082446  | oscillatory      |
| cg25234159 | EHHADH (+100992), VPS8 (+340963)    | 3  | 184870893 | C3orf70      | TSS200          | chr3:184870185-184871525  | Island            | NA                  | 1          | 0.19531481 | 0.01569547 | -0.0205583 | 0.11117176 | -0.0952454 | 0.04271342  | oscillatory      |
| cg23902471 | FAM19A5 (+153714)                   | 22 | 49039001  | FAM19A5      | Body            | chr22:49042371-49042632   | N_Shelf           | NA                  | 0          | 0.10720375 | -0.1158517 | -0.0914825 | 0.11069543 | -0.0263197 | 0.14079928  | oscillatory      |
| cg01793593 | ROBO1 (+749621)                     | 3  | 79067437  | ROBO1        | Body            | chr3:79067882-79068566    | N_Shore           | NA                  | 0          | 0.1255185  | -0.0158687 | -0.0367076 | 0.10982667 | 0.02886514 | -0.0226237  | transient        |
| cg11011938 | SEMA5A (+256)                       | 5  | 9545976   | SEMA5A;SEM5  | 5'UTR;1stExon   | chr5:9544692-9546715      | Island            | HA-E2F1             | 0          | 0.11074852 | 0.00266551 | 0.02715105 | 0.10978637 | -0.0467778 | -0.0141865  | transient        |
| cg05143078 | EDC3 (+329)                         | 15 | 74988056  | EDC3         | 5'UTR           | chr15:74988166-74988669   | N_Shore           | NA                  | 0          | 0.12681228 | -0.0843618 | -0.0061417 | 0.10911236 | -0.0101186 | -0.0627996  | oscillatory      |
| cg13688098 | AASDH (+71782), CEP135 (+366819)    | 4  | 57181855  | KIAA1211     | Body            | chr4:57180957-57182147    | Island            | NA                  | 0          | 0.14737407 | 0.08535652 | 0.00172098 | 0.10877485 | 0.02021454 | -0.0452023  | transient        |
| cg24716125 | NBEAL2 (-87364), PTH1R (+10070)     | 3  | 46933808  | PTH1R        | Body            | chr3:46933746-46934293    | Island            | Max c-Myc           | 1          | 0.11944255 | -0.0856585 | 0.12193495 | 0.10876139 | -0.0164962 | 0.00367744  | early            |
| cg01525017 | DNAJC19 (-474649), SOX2 (-247501)   | 3  | 181182210 |              |                 |                           | NA                | 0                   | 0.10701498 | -0.0549836 | 0.00874737 | 0.10828913 | -0.0024598 | -0.0282988 | transient   |                  |
| cg21806985 | MCC (-120)                          | 5  | 112824646 | MCC          | TSS200          | chr5:112823256-112824304  | S_Shore           | NA                  | 1          | 0.15074165 | -0.0055048 | -0.040137  | 0.10815469 | -0.0299739 | 0.04394213  | transient        |
| cg23415761 | GNPDA1 (-176)                       | 5  | 141392795 | GNPDA1       | TSS200          | chr5:141392360-141392587  | S_Shore           | HA-E2F1 Pol2 ZNF2   | 1          | 0.11796612 | -0.0519216 | 0.0003326  | 0.10782949 | -0.0025122 | 0.0566334   | oscillatory      |
| cg15526246 | MSRA (-151402), TNKS (+346983)      | 8  | 9760427   | LOC157627    | Body            | chr8:9760750-9761643      | N_Shore           | NA                  | 0          | 0.10969093 | -0.0367815 | 0.04701419 | 0.10756229 | 0.05265922 | 0.02933215  | transient        |
| cg14406859 | TRP2 (-4673)                        | 17 | 16314182  |              |                 | chr17:16310306-16310914   | S_Shelf           | NA                  | 0          | 0.11923228 | 0.02863457 | -0.194545  | 0.10711642 | -0.08993   | -0.0628707  | oscillatory      |
| cg02666008 | RBM15 (-1578)                       | 1  | 110880366 |              |                 | chr1:110880394-110880624  | N_Shore           | CEBPB CCNT2 BAF1    | 1          | 0.13431501 | -0.0285335 | -0.0515531 | 0.10627811 | -0.0341944 | -0.0864078  | oscillatory      |
| cg02016838 | ZC3H12C (-555)                      | 11 | 109963531 | ZC3H12C      | TSS1500         | chr11:109963240-109964677 | Island            | HA-E2F1 Pol2-4H8    | 1          | 0.14950264 | -0.0702292 | 0.0473032  | 0.10598467 | -0.0164502 | 0.0068095   | transient        |
| cg01276381 | LATS1 (-376)                        | 6  | 150039767 | LATS1        | TSS1500         | chr6:150038664-150039440  | S_Shore           | eGFP-GATA3 GATA-    | 1          | 0.12140868 | -0.0005005 | -0.0198535 | 0.10543173 | -0.0725089 | -0.0302889  | oscillatory      |
| cg05559643 | NDNF (-144024), QRFRP (+164484)     | 4  | 122137696 | TNIP3        | TSS200          |                           | NA                | 1                   | 0.11316021 | 0.02837039 | -0.0235968 | 0.1052502  | 0.10526024 | -0.0192178 | transient   |                  |
| cg06570432 | SORCS2 (+106803), SPAPL1 (+135523)  | 4  | 7301176   | SORCS2       | Body            |                           | NA                | 1                   | 0.11197437 | -0.0062105 | 0.00499488 | 0.10486896 | 0.01614314 | 0.05336272 | oscillatory |                  |
| cg16792014 | XPTO (-514364), SRGAP1 (+45248)     | 12 | 64283788  | SRGAP1       | Body            |                           | GR                | 1                   | 0.10115394 | 0.02248623 | -0.005828  | 0.10452102 | -0.0851907 | 0.0863394  | oscillatory |                  |
| cg20740029 | SLCSA8 (+180)                       | 12 | 101603835 | SLCSA8;SLCS  | 1stExon;5'UTR   | chr12:101603387-101603933 | Island            | HA-E2F1 SUZ12 U1    | 0          | 0.16030252 | -0.0113407 | 0.00578367 | 0.10444761 | -0.0304109 | -0.0717856  | oscillatory      |
| cg06918804 | PRIMA1 (-51)                        | 14 | 94254816  | PRIMA1       | TSS200          | chr14:94253952-94255733   | Island            | TBP HA-E2F1         | 1          | 0.22991434 | 0.02732713 | -0.0026148 | 0.10441179 | 0.00479842 | -0.0241899  | transient        |
| cg26215849 | MTRF1 (+49)                         | 13 | 41837663  | MTRF1;MTRF   | 5'UTR;1stExon   |                           | NA                | 1                   | 0.18649884 | 0.01647275 | -0.0246899 | 0.10431898 | -0.2337346 | -0.090723  | oscillatory |                  |
| cg18947032 | KIAA1279 (-202)                     | 10 | 70748274  | KIAA1279     | TSS1500         | chr10:70748435-70749334   | N_Shore           | Mxi1(bHLH) IRF3 I   | 0          | 0.12575394 | 0.01867021 | -0.1636914 | 0.10390616 | -0.0719273 | 0.03160601  | oscillatory      |
| cg10195962 | AGAP9 (-442744), ANXA8L2 (-90550)   | 10 | 47656369  |              |                 | chr10:47655677-47656379   | Island            | ZNF263 CHD2_N-1.    | 1          | 0.12893798 | 0.05254257 | -0.0264808 | 0.10388994 | 0.02663847 | -0.0421191  | transient        |
| cg14194478 | FCN2 (-148564), COL5A1 (+90442)     | 9  | 137624093 | COL5A1       | Body            |                           | NA                | 0                   | 0.12398908 | -0.0044057 | 0.02370415 | 0.10382819 | 0.04887971 | 0.00377586 | transient   |                  |
| cg06824157 | TRIO (-313673), ANKH (+414385)      | 5  | 14457501  | TRIO         | Body            | chr5:14461130-14461463    | N_Shelf           | NA                  | 0          | 0.1241481  | 0.03579466 | 0.06326067 | 0.10308786 | -0.038654  | 0.06968213  | oscillatory      |
| cg00868860 | DCD (+200)                          | 12 | 55041948  | DCD          | Body            |                           | NA                | 0                   | 0.10088246 | 0.0462961  | -0.0701135 | 0.1029584  | -0.0094968 | -0.0160133 | oscillatory |                  |
| cg23346462 | PEXSL (-17)                         | 3  | 179754533 | PEXSL        | TSS200          | chr3:179754520-179755245  | Island            | GATA3_(SC-268) NR   | 1          | 0.15066837 | 0.0423836  | 0.0041519  | 0.10282447 | -0.0245305 | 0.07007786  | oscillatory      |
| cg00985958 | B3GAT2 (+60791), SMAP1 (+228518)    | 6  | 71605996  | B3GAT2       | Body            |                           | NA                | 0                   | 0.101464   | -0.001559  | -0.0131252 | 0.10272479 | 0.07507657 | -0.0611707 | oscillatory |                  |
| cg16059311 | INSIG1 (-106943), HTR5A (+119997)   | 7  | 154982542 |              |                 |                           | CTCF HA-E2F1 CCN  | 1                   | 0.102524   | 0.01367106 | 0.010984   | 0.10257361 | -0.0165656 | -0.0093312 | transient   |                  |
| cg12816057 | ADRB2 (-171949), HTR4 (-17583)      | 5  | 148034206 | HTR4         | TSS1500         | chr5:148033472-148034080  | S_Shore           | PU.1                | 1          | 0.10604515 | 0.11194423 | -0.1518773 | 0.10233968 | -0.0232675 | 0.1668183   | oscillatory      |
| cg19797516 | PDSS1 (-130140), APBB1P (+129189)   | 10 | 26856454  | APBB1P       | 3'UTR           | chr10:26855906-26856198   | S_Shore           | NA                  | 0          | 0.1103772  | -0.0101005 | 0.01127834 | 0.10220574 | 0.03915784 | -0.0033016  | transient        |
| cg11125883 | MDM1 (-2885)                        | 12 | 68729045  |              |                 | chr12:68725847-68726475   | S_Shelf           | NA                  | 0          | 0.11808638 | 0.00998759 | 0.01690148 | 0.10193381 | 0.01133192 | 0.01399226  | transient        |
| cg23926793 | KHDRBS2 (-565)                      | 6  | 62996664  | KHDRBS2      | TSS1500         | chr6:62995855-62996228    | S_Shore           | NA                  | 0          | 0.14232482 | -0.0204341 | 0.03329289 | 0.10189555 | -0.0258383 | 0.09040897  | oscillatory      |
| cg14051353 | SPATA19 (-84850), IGSF9B (+26638)   | 11 | 133800241 | IGSF9B       | Body            | chr11:133800684-133800931 | N_Shore           | NA                  | 0          | 0.1323263  | -0.0598925 | -0.0145042 | 0.10184422 | -0.0046336 | 0.06114465  | oscillatory      |
| cg04752565 | SMAGP (-454)                        | 12 | 51664655  | SMAGP;SMA    | TSS1500;TSS1500 | chr12:51663404-51664411   | N_Shore           | BAF170 In1 Pol2 I-  | 0          | 0.10719587 | -0.0267167 | 0.06518821 | 0.10174991 | 0.03492138 | -0.00379    | early            |
| cg04112471 | ACPL2 (-167251), SPSB4 (+12688)     | 3  | 140783430 | SPSB4        | 5'UTR           | chr3:140784809-140785481  | N_Shore           | NA                  | 0          | 0.11073176 | 0.02597585 | -0.0453173 | 0.10088703 | -0.0615812 | -0.0666514  | oscillatory      |
| cg27125304 | PRKG1 (+212478), CSTF2 (+495966)    | 10 | 52963388  | PRKG1;PRKG   | Body;Body       |                           | NA                | 1                   | 0.1158633  | -0.0500059 | -0.0085128 | 0.10085946 | -0.0210171 | -0.0381306 | transient   |                  |
| cg17966435 | MYL5 (-4255), ATP5I (+671)          | 4  | 667455    | ATP5I        | Body            | chr4:667273-667601        | Island            | Pol2 bHLH HEY.      | 1          | 0.12316134 | -0.0615464 | -0.1076778 | 0.10083742 | -0.0633556 | 0.08039274  | oscillatory      |
| cg18316974 | GLMN (-182470), GF11 (+4592)        | 1  | 92947035  | GF11;GF11;GF | Body;Body;Body  | chr1:92945907-92952609    | Island            | NA                  | 1          | 0.10707271 | -0.0166454 | -0.0234539 | 0.10064875 | 0.02135241 | -0.0007817  | transient        |
| cg15371617 | HAVCR2 (+110)                       | 5  | 156536137 | HAVCR2;HAV   | 5'UTR;1stExon   |                           | NA                | 1                   | 0.11386369 | 0.00791653 | 0.03874405 | 0.10037843 | -0.0695179 | -0.032499  | oscillatory |                  |
| cg00032805 | MARCH1 (-67)                        | 4  | 165304473 | MARCH1       | TSS200          | chr4:165304328-165305177  | Island            | Rad21 SUZ12         | 1          | 0.1169911  | -0.2110892 | -0.0835517 | 0.1001369  | -0.0398041 | 0.05453259  | oscillatory      |
| cg26947543 | NONE                                | 13 | 69459742  |              |                 |                           | NA                | 0                   | 0          |            |            |            |            |            |             |                  |



|            |                                    |    |           |                                 |                          |                           |         |                    |            |              |            |            |            |            |                                    |                                    |
|------------|------------------------------------|----|-----------|---------------------------------|--------------------------|---------------------------|---------|--------------------|------------|--------------|------------|------------|------------|------------|------------------------------------|------------------------------------|
| cg13476313 | NR5A1 (+24934), GPR144 (+31342)    | 9  | 127244764 | NR5A1                           | 3'UTR                    |                           | IRF1    | 1                  | -0.1710666 | 0.05516015   | -0.0083572 | -0.1020914 | 0.02887434 | -0.0284706 | transient response hypomethylation |                                    |
| cg25711289 | CRIPAK (-48932), MAEA (+52736)     | 4  | 1336407   |                                 |                          | chr4:1340107-1341471      | N_Shelf | NA                 | 0          | -0.1075282   | -0.040113  | 0.03654529 | -0.1021332 | -0.0673356 | transient response hypomethylation |                                    |
| cg05798436 | DAPP1 (-164830), MTPP (+87911)     | 4  | 100573150 |                                 |                          | chr4:100573059-100573578  | Island  | NA                 | 0          | -0.1166537   | -0.1104475 | 0.04465304 | -0.1021976 | 0.12257471 | -0.0274308                         | oscillatory response               |
| cg16013919 | DNAJB6 (+529163), PTPRN2 (+721609) | 7  | 157658872 | PTPRN2                          | Body                     | chr7:157659433-157660322  | N_Shore | NA                 | 0          | -0.1884816   | 0.03673274 | -0.0224007 | -0.1023748 | 0.07014649 | -0.0423302                         | oscillatory response               |
| cg10958087 | HINT1 (+190072)                    | 5  | 130310961 |                                 |                          |                           |         | NA                 | 0          | -0.1930255   | 0.01249791 | 0.0316184  | -0.1024771 | 0.06968627 | 0.02447629                         | oscillatory response               |
| cg19373290 | NKX6-2 (-138762), TTC40 (+17790)   | 10 | 134738298 |                                 |                          | chr10:134738218-134738704 | Island  | NA                 | 0          | -0.1055146   | -0.0394131 | 0.00655938 | -0.1028567 | 0.02275378 | 0.00957523                         | transient response hypomethylation |
| cg03018678 | IRX5 (-612769), IRX3 (-31964)      | 16 | 54352341  |                                 |                          |                           |         | NA                 | 0          | -0.1773215   | -0.0291179 | 0.02984008 | -0.103027  | -0.0543989 | -0.0365671                         | transient response hypomethylation |
| cg09795569 | DYRK3 (+720)                       | 1  | 206809600 | DYRK3;DYRK5                     | 5'UTR;Body               | chr1:206808523-206809187  | S_Shore | NA                 | 1          | -0.1902969   | -0.0126362 | 0.01006173 | -0.1041695 | 0.11281928 | -0.022789                          | oscillatory response               |
| cg10599988 | STARD4 (-208764), NREP (+255707)   | 11 | 111056920 |                                 |                          |                           |         | NA                 | 0          | -0.1122786   | -0.0541279 | 0.02297788 | -0.1041927 | 0.04126604 | -0.044418                          | transient response hypomethylation |
| cg14045860 | CD44 (-2133)                       | 5  | 35158283  |                                 |                          | chr11:35160375-35161000   | N_Shelf | CEBPB              | 0          | -0.1216759   | -0.1395371 | 0.09196881 | -0.1043405 | 0.13781118 | -0.071275                          | oscillatory response               |
| cg17374364 | OTP (+5457), PDE8B (+422359)       | 5  | 76929064  | OTP                             | Body                     | chr5:76932317-76933523    | N_Shelf | NA                 | 0          | -0.1394528   | 0.05749992 | -0.01177   | -0.104453  | 0.00334046 | -0.0590038                         | oscillatory response               |
| cg11579999 | ZNF295 (-1034)                     | 21 | 43431529  | ZNF295                          | TSS1500                  | chr21:43429279-43431489   | S_Shore | Rad21 CTCF CTCF_(  | 1          | -0.1192012   | 0.01794743 | -0.0169923 | -0.1045898 | 0.03998002 | -0.0413715                         | transient response hypomethylation |
| cg08822075 | NFE2L3 (+1761), HNRNPA2B1 (+46805) | 7  | 26193607  | NFE2L3                          | Body                     | chr7:26191794-26192757    | S_Shore | Pol2 TAF1 POU5F1   | 0          | -0.1235512   | -0.0167127 | -0.0079141 | -0.1047667 | 0.13731887 | 0.02167449                         | oscillatory response               |
| cg25828427 | E2F7 (-412583), NAV3 (-353126)     | 12 | 77871942  |                                 |                          |                           |         | NA                 | 0          | -0.1292445   | -0.0446526 | -0.0033378 | -0.1048479 | 0.08573781 | -0.1089076                         | oscillatory response               |
| cg13430807 | SFB4 (-3172)                       | 1  | 149903315 | MTMR11                          | Body                     | chr1:149899625-149899893  | S_Shelf | NA                 | 0          | -0.1127565   | 0.00357478 | 0.04539782 | -0.105317  | -0.0332489 | 0.03149004                         | transient response hypomethylation |
| cg23079522 | PPM1L (+95633), B3GALNT1 (+253054) | 3  | 160569628 | PPM1L                           | Body                     |                           |         | NA                 | 1          | -0.1152649   | 0.03163082 | 0.00297724 | -0.1059424 | -0.0485587 | -0.0200865                         | transient response hypomethylation |
| cg03972398 | HOXC13 (+604)                      | 12 | 54333179  | HOXC13                          | 1stExon                  | chr12:54332805-54333731   | Island  | NA                 | 1          | -0.1255517   | 0.11864824 | -0.0589809 | -0.1060001 | 0.04847834 | 0.12587368                         | oscillatory response               |
| cg18610738 | METTL7B (-240)                     | 12 | 56075089  | METTL7B                         | TSS1500                  |                           |         | CTCF Rad21 SMC3_   | 1          | -0.1071326   | 0.01268175 | -0.0846663 | -0.106171  | -0.0394062 | 0.00572923                         | early response hypomethylation     |
| cg22937556 | TUBA3C (+63656)                    | 13 | 19692335  | DKFz686A1                       | Body                     |                           |         | NA                 | 0          | -0.1024667   | 0.07423393 | 0.12005529 | -0.1061957 | -0.0308433 | 0.12604221                         | oscillatory response               |
| cg14159894 | NONE                               | 20 | 11872261  | BTB03                           | 5'UTR                    | chr20:11871374-11872207   | S_Shore | HA-E2F1 Pol2 Egr-1 | 1          | -0.3291896   | -0.0010868 | 0.02539884 | -0.1062475 | -0.0376078 | -0.0225841                         | transient response hypomethylation |
| cg23452498 | PRELID2 (+325291)                  | 5  | 144889607 |                                 |                          |                           |         | NA                 | 0          | -0.1184982   | 0.05090374 | 0.04521313 | -0.1066622 | 0.01192907 | 0.02248068                         | transient response hypomethylation |
| cg18114671 | NOL4 (-322)                        | 18 | 31803836  | NOL4                            | TSS1500                  | chr18:31804480-31804875   | N_Shore | NA                 | 0          | -0.1250888   | -0.0453046 | -0.0313733 | -0.1073588 | -0.0861059 | -0.0185581                         | transient response hypomethylation |
| cg00994876 | D2HGDH (-10786), ING5 (+21788)     | 2  | 242663243 | ING5                            | Body                     | chr2:242663547-242663872  | N_Shore | NA                 | 0          | -0.1003092   | -0.0272545 | 0.04698225 | -0.1078962 | -0.1096416 | 0.06042687                         | oscillatory response               |
| cg05110803 | PGPEP1L (+163561), IGF1R (+192563) | 15 | 99385323  | IGF1R                           | Body                     |                           |         | NA                 | 0          | -0.12819528  | -0.0508452 | 0.05878879 | -0.1080538 | 0.04833663 | 0.01573245                         | oscillatory response               |
| cg11741189 | PAX6 (-4378)                       | 11 | 31843886  |                                 |                          | chr11:31841315-31842003   | S_Shore | NA                 | 0          | -0.1084196   | 0.00968486 | -0.0098192 | -0.1092474 | -0.1029489 | -0.008542                          | transient response hypomethylation |
| cg11670211 | NOX4 (+364)                        | 11 | 89224288  | NOX4;NOX4                       | 5'UTR;Body               | chr11:89224416-89224718   | N_Shore | NA                 | 1          | -0.1582207   | 0.09843061 | 0.03846049 | -0.1092509 | 0.07242737 | 0.06266525                         | oscillatory response               |
| cg13210581 | CKNAA4 (+393761)                   | 11 | 29644815  |                                 |                          |                           |         | Pol2 TBP SP1 TAF1  | 1          | -0.1250909   | 0.03079794 | 0.03290753 | -0.1095618 | -0.0241474 | -0.0257262                         | transient response hypomethylation |
| cg23644960 | TRPC6 (-165)                       | 11 | 101454823 | TRPC6                           | TSS200                   | chr11:101453357-101454684 | S_Shore | NA                 | 1          | -0.1193003   | -0.0789419 | 0.04764188 | -0.1107341 | 0.00922545 | 0.16363132                         | oscillatory response               |
| cg06956075 | CAPS2 (-4917), GLIPR1L1 (+290)     | 12 | 75287852  | GLIPR1L1                        | Body                     |                           |         | NA                 | 1          | -0.1560511   | 0.0250721  | -0.0440867 | -0.1109223 | -0.0855369 | -0.0423432                         | transient response hypomethylation |
| cg16454107 | TMEM100 (+772)                     | 17 | 53799452  | TMEM100                         | 5'UTR                    |                           |         | NA                 | 0          | -0.1083643   | 0.0588544  | 0.0305869  | -0.1110197 | -0.0257634 | -0.0135591                         | transient response hypomethylation |
| cg00400832 | DLX5 (+3819), DLX6 (+15034)        | 7  | 96650323  | DLX5                            | Body                     | chr7:96650221-96651551    | Island  | NA                 | 0          | -0.1009333   | 0.01548216 | 0.04205927 | -0.1112511 | 0.06596688 | -0.0585979                         | oscillatory response               |
| cg01343624 | COBL (-457606)                     | 7  | 51842120  |                                 |                          |                           |         | USF-1 CTCF Rad21   | 1          | -0.1248942   | 0.09098739 | 0.01909155 | -0.1113721 | -0.0464002 | -0.0516207                         | oscillatory response               |
| cg1012131  | MLL7 (+1036), HGC6.3 (+148912)     | 6  | 168228706 | C6orf124;MLTSS1500              | Body                     | chr6:168226063-168228559  | S_Shore | Pol2               | 1          | -0.1913237   | -0.1083968 | 0.01977064 | -0.1116416 | -0.0053975 | 0.03303157                         | transient response hypomethylation |
| cg25667495 | NR112 (-76380), C3orf15 (+3308)    | 3  | 119425176 | C3orf15                         | Body                     | chr3:119421855-119422334  | S_Shelf | NA                 | 0          | -0.1398395   | 0.00295177 | -0.0036579 | -0.1118229 | -0.0596785 | 0.03606098                         | transient response hypomethylation |
| cg02235871 | C3orf23 (-317937), ABHD5 (+329632) | 3  | 44062006  |                                 |                          | chr3:44063314-44063837    | N_Shore | NA                 | 0          | -0.1018694   | -0.0570376 | 0.05352547 | -0.1120131 | 0.06748186 | 0.00606904                         | oscillatory response               |
| cg00899976 | ZBP1 (-31909), PMEPA1 (+57490)     | 20 | 56227540  | PMEPA1                          | Body                     | chr20:56227252-56227687   | Island  | NA                 | 0          | -0.1366346   | 0.01583857 | -0.0682228 | -0.1122131 | -0.0561895 | -0.0213323                         | early response hypomethylation     |
| cg00309339 | TOMM7 (-31233), FAM126A (+160116)  | 7  | 22893653  |                                 |                          | chr7:22893794-22894577    | N_Shore | Pbx3 CTCF AP-2gan  | 1          | -0.1192003   | -0.0433078 | -0.006468  | -0.1122492 | 0.04124836 | 0.00763709                         | transient response hypomethylation |
| cg24674640 | MLL5 (-25886), LHFPL3 (+659647)    | 7  | 104628750 |                                 |                          | chr7:104624337-104624848  | S_Shelf | NA                 | 1          | -0.1240198   | -0.0050673 | -0.0423293 | -0.1122624 | 0.00510236 | -0.0896944                         | oscillatory response               |
| cg16857428 | ZNF559 (+759)                      | 19 | 9435206   | ZNF559;ZNF5                     | 1stExon;5'UTR            | chr19:9434784-9435144     | S_Shore | TFIIC-110          | 0          | -0.1137592   | 0.00668074 | -0.0205497 | -0.1123011 | 0.05521307 | 0.01682529                         | transient response                 |
| cg27112993 | LHX1 (-51966), MRM1 (+284781)      | 17 | 35242805  |                                 |                          |                           |         | KAP1               | 1          | -0.1066903   | 0.02296979 | -0.0167114 | -0.1123511 | -0.0259051 | -0.0312706                         | transient response hypomethylation |
| cg15392054 | RER1 (-51548), SKI (+111532)       | 1  | 2271665   | MORN1                           | Body                     |                           |         | ZNF263             | 1          | -0.131629    | -0.0673479 | 0.01638509 | -0.1131828 | 0.0030162  | -0.1196669                         | oscillatory response               |
| cg00705142 | PVRL3 (-817)                       | 3  | 110789788 | PVRL3                           | TSS1500                  | chr3:110790149-110791401  | N_Shore | CTCF               | 1          | -0.1212591   | 0.02229784 | -0.0039231 | -0.1132423 | -0.0031518 | -0.0121272                         | transient response hypomethylation |
| cg13782919 | SYK (+24831), AUH (+535363)        | 9  | 93588842  | SYK;SYK                         | Body;5'UTR;TSS1500       |                           |         | NA                 | 1          | -0.1024156   | 0.00816401 | 0.00379497 | -0.1134949 | -0.0219484 | -0.0776868                         | oscillatory response               |
| cg12934804 | ARG2 (-29)                         | 14 | 68086549  | ARG2                            | TSS200                   | chr14:68086277-68086957   | Island  | CTBP2 E2F6 JunD c  | 1          | -0.1184776   | 0.04485049 | -0.0508911 | -0.1135438 | 0.07784009 | 0.0839542                          | oscillatory response               |
| cg07309764 | GNAI1 (-225)                       | 7  | 79763914  | GNAI1                           | TSS1500                  | chr7:79763793-79764889    | Island  | CTBP2 Ini1 GR CTCI | 1          | -0.1890427   | -0.0907129 | 0.03433562 | -0.1142243 | -0.0443624 | 0.02810088                         | transient response hypomethylation |
| cg18934293 | MEST (-332)                        | 7  | 130131566 | MEST;MEST;TSS1500;5'UTR;TSS1500 | chr7:130130739-130131111 | Island                    | NA      | 0                  | -0.1133929 | 0.03735805   | -0.0889657 | -0.114537  | -0.1025383 | -0.1047447 | constant hypomethylation           |                                    |
| cg13180315 | HOXD3 (-4510)                      | 2  | 177024294 |                                 |                          | chr2:177024501-177025692  | N_Shore | SUZ12              | 0          | -0.1472264   | 0.09961299 | -0.0205668 | -0.1146531 | 0.00190856 | -0.0095693                         | transient response hypomethylation |
| cg04598517 | SLC6A3 (0)                         | 5  | 1445542   | SLC6A3;SLC6                     | 5'UTR;1stExon            | chr5:1444678-14446648     | Island  | Pol2               | 1          | -0.1175989   | 0.02719035 | 0.03330908 | -0.1148982 | -0.0238902 | 0.01264521                         | transient response hypomethylation |
| cg15586341 | ANAPC16 (-75959), SPOCK2 (-51268)  | 10 | 73899798  | ASCC1                           | Body                     |                           |         | NA                 | 0          | -0.1052366   | 0.0022459  | -0.0615627 | -0.115026  | -0.0764757 | 0.01691061                         | early response hypomethylation     |
| cg15886307 | CIT (-575)                         | 12 | 120315669 | CIT                             | TSS1500                  | chr12:120314847-120315169 | S_Shore | NA                 | 0          | -0.1220966   | 0.05974475 | -0.0294468 | -0.1151903 | 0.05332925 | 0.06258451                         | oscillatory response               |
| cg27543214 | DDR1 (-94636), IER3 (-49502)       | 6  | 30761828  |                                 |                          |                           |         | p300 TBP FOXA1_(   | 1          | -0.1250874   | -0.1359157 | -0.0003136 | -0.1152452 | 0.06123619 | 0.00206338                         | oscillatory response               |
| cg13706365 | USP6NL (+70054), CELF2 (+444327)   | 10 | 11504219  | USP6NL;USP3                     | 3'UTR;3'UTR              | chr10:11505222-11505766   | N_Shore | CEBPB              | 0          | -0.1424812   | -0.0084425 | 0.1092866  | -0.1152484 | 0.01080463 | 0.01251892                         | oscillatory response               |
| cg09256131 | BCL11B (-672)                      | 14 | 99738493  | BCL11B;BCL11                    | TSS1500;TSS1500          | chr14:99739801-99740920   | N_Shore | Pol2 CTCF Pol2-4Hf | 0          | -0.1243757   | -0.0117715 | -0.0218644 | -0.1153548 | -0.0181553 | -0.02028174                        | transient response hypomethylation |
| cg05848045 | SOX4 (+176762), PRL (+532348)      | 6  | 21770733  | FLJ22536                        | Body                     |                           |         | NA                 | 0          | -0.1211589   | -0.0726906 | 0.06395654 | -0.1158776 | -0.0297167 | -0.0433587                         | oscillatory response               |
| cg13333304 | CLDN11 (-452)                      | 3  | 170136200 | CLDN11                          | TSS1500                  | chr3:170136242-170137886  | N_Shore | NA                 | 1          | -0.2000531</ |            |            |            |            |                                    |                                    |

|            |                                     |    |           |                              |                                   |                           |            |                     |            |             |            |            |                                    |                                    |                                    |                                    |                                    |
|------------|-------------------------------------|----|-----------|------------------------------|-----------------------------------|---------------------------|------------|---------------------|------------|-------------|------------|------------|------------------------------------|------------------------------------|------------------------------------|------------------------------------|------------------------------------|
| cg20411555 | MKLN1 (-412519), KLF14 (-181188)    | 7  | 130600075 |                              | NA                                | 0                         | -0.1999601 | -0.0236835          | -0.0227137 | -0.1203684  | 0.02960376 | -0.073699  | oscillatory response               |                                    |                                    |                                    |                                    |
| cg04060367 | FEZF1 (-1649)                       | 7  | 121946213 | chr7:121945345-121946235     | Island                            | SUZ12                     | 0          | -0.1711646          | 0.04066557 | -0.0064107  | -0.1208545 | 0.02720827 | transient response hypomethylation |                                    |                                    |                                    |                                    |
| cg24258592 | RAB11FP2 (-770)                     | 10 | 119806883 | CASC2;RAB1:Body;TSS1500;Body | chr10:119805825-119806544         | S_Shore                   | HA-E2F1    | 0                   | -0.1277200 | -0.0349975  | 0.0800081  | -0.1209218 | -0.0029915                         | 0.02789413                         | oscillatory response               |                                    |                                    |
| cg03706720 | EPHB3 (-48648), CHR1 (+133078)      | 3  | 184230938 |                              | chr3:184231301-184231924          | N_Shore                   | NA         | 0                   | -0.1155099 | 0.02205356  | -0.0243225 | -0.1212447 | -0.0963804                         | 0.02302159                         | transient response hypomethylation |                                    |                                    |
| cg05059922 | PLXNC1 (-298002), CRADD (+173346)   | 12 | 94244496  | CRADD                        | 3'UTR                             | NA                        | 0          | -0.1033248          | -0.0057833 | 0.04420872  | -0.1216673 | 0.04695587 | -0.0227967                         | transient response hypomethylation |                                    |                                    |                                    |
| cg05984044 | GABRB1 (+887)                       | 4  | 47034181  | GABRB1                       | Body                              | chr4:47034427-47034940    | N_Shore    | NA                  | 0          | -0.1211603  | 0.01675783 | -0.0235694 | -0.121752                          | -0.0380331                         | -0.0693351                         | oscillatory response               |                                    |
| cg25922624 | TRIM2 (-50126), FHDC1 (+211337)     | 4  | 154075471 | TRIM2                        | 5'UTR                             | chr4:154074383-154075045  | S_Shore    | p300 TCF4 ERalpha   | 1          | -0.1073702  | -0.0863025 | -0.0359934 | -0.122164                          | -0.0175981                         | -0.0202592                         | transient response hypomethylation |                                    |
| cg22511684 | ABCE1 (-450849), HHIP (+1159)       | 4  | 145568306 | HHIP                         | Body                              | chr4:145566242-145567413  | S_Shore    | TAL1_(SC-12984) Pc  | 1          | -0.1021047  | -0.0605028 | 0.01692559 | -0.1224574                         | 0.02165363                         | 0.01238452                         | transient response hypomethylation |                                    |
| cg14321777 | BNIP3 (-79375), JAKMIP3 (-43503)    | 10 | 133874809 |                              | NA                                | NA                        | 0          | -0.1360941          | -0.0778552 | -0.0730218  | -0.1225532 | 0.03673837 | -0.0127099                         | early response hypomethylation     |                                    |                                    |                                    |
| cg18115064 | MDGA2 (+538)                        | 14 | 48143618  | MDGA2                        | Body                              | chr14:48143433-48145589   | Island     | NA                  | 1          | -0.1081727  | -0.02655   | -0.0560513 | -0.1225841                         | 0.06252307                         | 0.02404231                         | oscillatory response               |                                    |
| cg23806621 | BHLHE23 (-115)                      | 20 | 61638501  | BHLHE23                      | TSS200                            | chr20:61636171-61639055   | Island     | NA                  | 0          | -0.1840408  | -0.1859071 | -0.177053  | -0.1232239                         | -0.2505889                         | -0.1667438                         | constant hypomethylation           |                                    |
| cg18061847 | HAS2 (-699)                         | 8  | 122654328 | HAS2;HAS2A                   | TSS1500;Body                      | chr8:122651665-122652389  | S_Shore    | HA-E2F1             | 1          | -0.1602161  | -0.042394  | 0.06329251 | -0.1239281                         | 0.03971027                         | -0.0492945                         | oscillatory response               |                                    |
| cg17164345 | PAK1 (-86207), AQP11 (-29365)       | 11 | 77271314  |                              |                                   |                           |            | BAF155 STAT3 GTF    | 1          | -0.3426322  | -0.1482034 | -0.0575908 | -0.1252396                         | -0.1919325                         | -0.2498506                         | constant hypomethylation           |                                    |
| cg23749448 | RAB11FIP4 (-42284), EVI2A (-27591)  | 17 | 29676357  | NF1,NF1                      | Body;Body                         | chr17:29672335-29672612   | S_Shelf    | NA                  | 0          | -0.1348511  | -0.0024129 | 0.04931475 | -0.1259077                         | 0.02410539                         | 0.02068137                         | transient response hypomethylation |                                    |
| cg05101231 | TEX264 (-111830), RAD54L2 (+17864)  | 3  | 51593459  | RAD54L2                      | 5'UTR                             | NA                        | 0          | -0.1014348          | -0.02777   | 0.09134515  | -0.1259472 | -0.0812769 | 0.03040528                         | oscillatory response               |                                    |                                    |                                    |
| cg10820158 | PCTP (-17526), TMEM100 (-10589)     | 17 | 53810813  | TMEM100                      | TSS1500                           | NA                        | 0          | -0.1576482          | 0.03761439 | -0.0728956  | -0.1259577 | -0.0052653 | 0.02490936                         | early response hypomethylation     |                                    |                                    |                                    |
| cg03044684 | HUNK (+2405), MIS18A (+403343)      | 21 | 33248032  | HUNK                         | Body                              | chr21:33244910-33246609   | S_Shore    | NA                  | 1          | -0.1682911  | -0.0338676 | 0.04285502 | -0.1262562                         | 0.09403194                         | 0.01213326                         | oscillatory response               |                                    |
| cg15965301 | SEC14L1 (-31172), MGMT5B (+241035)  | 17 | 75105832  |                              | CTCF                              | NA                        | 0          | -0.1374959          | 0.00405159 | 0.12457599  | -0.1270084 | 0.05417472 | -0.0527019                         | oscillatory response               |                                    |                                    |                                    |
| cg06597095 | CCL28 (-67874), C5orf28 (+3630)     | 5  | 43480361  | C5orf28                      | 5'UTR                             | chr5:43483519-43484555    | N_Shelf    | NA                  | 0          | -0.2725831  | -0.2259461 | -0.0815063 | -0.1270944                         | -0.2314245                         | -0.2418151                         | constant hypomethylation           |                                    |
| cg23699324 | CTNNA2 (+249)                       | 2  | 79740308  | CTNNA2;CTN                   | 1stExon;5'UTR;5'UTR               | chr2:79739696-79740243    | S_Shore    | PoI2                | 0          | -0.1684762  | 0.08365542 | -0.0340705 | -0.1271249                         | 0.04197392                         | -0.1292121                         | oscillatory response               |                                    |
| cg15287806 | ZMYND11 (+11861), DIP2C (+497813)   | 10 | 237794    | ZMYND11                      | Body                              | NA                        | 1          | -0.1153414          | 0.0026626  | 0.00394767  | -0.1272944 | 0.12347388 | 0.04425434                         | oscillatory response               |                                    |                                    |                                    |
| cg16554447 | TINAG (-114750), MLIP (+82208)      | 6  | 54058452  | C6orf142                     | Body                              | c-Jun                     | 1          | -0.1087946          | 0.05013927 | -0.0516031  | -0.1274299 | 0.02257792 | 0.04925962                         | early response hypomethylation     |                                    |                                    |                                    |
| cg19192256 | PTGDR2 (+1729), CDC86 (+12286)      | 11 | 60621714  | GPR44                        | 5'UTR                             | chr11:60619924-60621111   | S_Shore    | eGFP-GATA2 GATA-    | 0          | -0.2911395  | -0.2971841 | -0.1309176 | -0.1277124                         | -0.2426533                         | -0.2388153                         | constant hypomethylation           |                                    |
| cg06938699 | MUC6 (-1070)                        | 11 | 1037775   | MUC6                         | TSS1500                           | chr11:1036420-1036827     | S_Shore    | NA                  | 0          | -0.106701   | -0.0317059 | 0.06969744 | -0.1280397                         | -0.0096521                         | 0.06190836                         | oscillatory response               |                                    |
| cg10582827 | SCAND3 (-29353), TRIM27 (+307303)   | 6  | 28584464  |                              | S_Shore                           | chr6:28583934-28584289    | S_Shore    | E2F6 E2F6_(H-50)    | 1          | -0.1475107  | -0.1032603 | -0.0273317 | -0.1283284                         | -0.0217115                         | -0.0560673                         | oscillatory response               |                                    |
| cg10900526 | DDHD1 (-348988), BMP4 (+452236)     | 14 | 53969033  |                              | NA                                | NA                        | 0          | -0.1726106          | -0.0380946 | -0.0537929  | -0.1285766 | 0.03509897 | -0.0741273                         | oscillatory response               |                                    |                                    |                                    |
| cg23051046 | SGPP2 (-111747), PAX3 (-13860)      | 2  | 223177574 |                              | S_Shore                           | chr2:223176493-223177515  | S_Shore    | NFKB                | 1          | -0.149717   | 0.01442884 | -0.074091  | -0.1288999                         | 0.02230195                         | 0.01439114                         | early response hypomethylation     |                                    |
| cg15470658 | LRP1 (-4140)                        | 12 | 57518141  |                              | N_Shelf                           | chr12:57521524-57522159   | N_Shelf    | CTCF ELF1_(SC-631)  | 1          | -0.1307489  | -0.0657944 | -0.1401773 | -0.1294209                         | -0.1299817                         | -0.0188096                         | early response hypomethylation     |                                    |
| cg00865927 | FERMT2 (-3230)                      | 14 | 53421044  |                              | S_Shelf                           | chr14:53417108-53418339   | S_Shelf    | PoI2-H8 TBP         | NA         | 0           | -0.1414382 | 0.00514972 | -0.0132768                         | -0.1302405                         | -0.0177914                         | -0.0399398                         | transient response hypomethylation |
| cg02913918 | ZNF648 (+263237), CACNA1E (+314924) | 1  | 181767609 | CACNA1E                      | Body                              | chr1:181767493-181767893  | Island     | NA                  | 0          | -0.1152893  | -0.0080931 | -0.0949334 | -0.1302535                         | 0.01559454                         | 0.01393946                         | early response hypomethylation     |                                    |
| cg07203440 | TMEM132D (+30999)                   | 12 | 130357212 | TMEM132D                     | Body                              | NA                        | 1          | -0.1953944          | -0.0938457 | -0.0138673  | -0.1305956 | 0.00535157 | -0.0067017                         | transient response hypomethylation |                                    |                                    |                                    |
| cg26872045 | SLC27A4 (-391620), FBN2 (-35855)    | 5  | 127909589 |                              | NA                                | NA                        | 0          | -0.1055407          | -0.0092195 | 0.03766178  | -0.1314783 | -0.0099895 | -0.0442652                         | transient response hypomethylation |                                    |                                    |                                    |
| cg09241022 | FOXG1 (+18244)                      | 14 | 29254530  | C14orf23                     | Body                              | chr14:29254365-29255069   | Island     | NA                  | 0          | -0.1397673  | -0.0830304 | 0.019269   | -0.131572                          | -0.0823192                         | 0.07892424                         | oscillatory response               |                                    |
| cg14888916 | STK3 (-113512), OSR2 (-5210)        | 8  | 99951420  |                              | N_Shore                           | chr8:99952020-99954686    | N_Shore    | NA                  | 1          | -0.1154455  | -0.0953138 | 0.06076627 | -0.1322516                         | 0.00550212                         | 0.05699317                         | oscillatory response               |                                    |
| cg04023150 | RNF220 (+2105), TMEM53 (+267034)    | 1  | 44873064  | RNF220                       | 5'UTR                             | chr1:44871109-44874047    | Island     | NA                  | 1          | -0.1016955  | -0.0784494 | -0.0776878 | -0.1336879                         | -0.0173163                         | 0.01395422                         | early response hypomethylation     |                                    |
| cg08050748 | TRIM9 (-469)                        | 14 | 51562890  | TRIM9;TRIM                   | TSS1500;TSS1500                   | chr14:51560116-51562487   | S_Shore    | Max                 | 1          | -0.1018679  | -0.0396462 | 0.00538707 | -0.133974                          | 0.00037802                         | 0.03946332                         | transient response hypomethylation |                                    |
| cg26238975 | DIO3 (-507025), RTL1 (-169479)      | 14 | 101520662 | MIR134;MIR                   | TSS1500;Body;TSS1500              | NA                        | 0          | -0.1473181          | -0.0213408 | 0.04733458  | -0.1351321 | 0.05727727 | -0.0078162                         | oscillatory response               |                                    |                                    |                                    |
| cg10370599 | HS3ST2 (-701)                       | 16 | 22825158  | HS3ST2                       | TSS1500                           | chr16:22824616-22826459   | Island     | NA                  | 1          | -0.1578716  | 0.02247318 | -0.0077913 | -0.1360105                         | -0.0368069                         | -0.0605593                         | oscillatory response               |                                    |
| cg11930390 | IFT81 (-330)                        | 12 | 110561809 | IFT81;IFT81;                 | TSS1500;TSS1500;TSS               | chr12:110562095-110562700 | N_Shore    | Max E2F6 USF2 HE    | 1          | -0.1001224  | -0.0522505 | -0.0622886 | -0.1375773                         | -0.006767                          | -0.0506009                         | oscillatory response               |                                    |
| cg11856334 | LRRTM1 (-890877)                    | 2  | 81422363  |                              | Island                            | chr2:81421204-81422532    | Island     | NA                  | 0          | -0.168951   | 0.04346548 | 0.03178274 | -0.1384249                         | 0.00329921                         | 0.0606608                          | oscillatory response               |                                    |
| cg11044716 | RFXAP (-124209), SERTM1 (+21081)    | 13 | 37269129  | C13orf36                     | 5'UTR                             | NA                        | 0          | -0.1285464          | -0.0936524 | 0.00392748  | -0.1386136 | -0.0843271 | 0.05414343                         | oscillatory response               |                                    |                                    |                                    |
| cg11626175 | JARID2 (+118548), DTNBP1 (+298214)  | 6  | 15365074  | JARID2                       | Body                              | NA                        | 1          | -0.1020581          | -0.0244616 | 0.0359051   | -0.1386856 | -0.0031332 | 0.05560137                         | oscillatory response               |                                    |                                    |                                    |
| cg04578894 | ADAMTS12 (+49826), TARS (+401400)   | 5  | 33842297  | ADAMTS12                     | Body                              | NA                        | 1          | -0.1260244          | 0.03669262 | 0.00457387  | -0.1388436 | 0.07150658 | -0.0262864                         | oscillatory response               |                                    |                                    |                                    |
| cg14870242 | SAMD4A (+317)                       | 14 | 55034646  | SAMD4A;SAP                   | 1stExon;1stExon                   | chr14:550331826-55035030  | Island     | PoI2 Rad21 CTCF C   | 0          | -0.1214234  | 0.00952052 | 0.01546915 | -0.139628                          | -0.0102211                         | 0.01649242                         | transient response hypomethylation |                                    |
| cg04476125 | BMP3 (-643715), FGF5 (+120662)      | 4  | 81308403  | C4orf22                      | Body                              | chr4:81307471-81307952    | S_Shore    | NA                  | 0          | -0.1324204  | 0.01441541 | 0.01769489 | -0.1405719                         | -0.1442293                         | -0.0385764                         | transient response hypomethylation |                                    |
| cg03258749 | GABPB2 (-2674)                      | 1  | 151040405 | MLLT1                        | 3'UTR                             | chr19:151042870-151043537 | N_Shelf    | NA                  | 0          | -0.1110665  | 0.04340734 | 0.00100853 | -0.1406474                         | 0.10404805                         | 0.02151623                         | oscillatory response               |                                    |
| cg15734230 | PEG3 (-258878), USP29 (-20537)      | 19 | 57610971  |                              | S_Shore                           | chr19:57610688-57610937   | S_Shore    | NA                  | 0          | -0.1151409  | 0.01904984 | -0.0315959 | -0.1409181                         | 0.04340172                         | 0.05301505                         | oscillatory response               |                                    |
| cg19197744 | NOV (+967)                          | 8  | 120429518 | NOV                          | Body                              | chr8:120428398-120429178  | S_Shore    | AP-2gamma AP-2alpha | 1          | -0.13292073 | -0.005771  | -0.0480376 | -0.1411109                         | 0.02805997                         | -0.0270509                         | transient response hypomethylation |                                    |
| cg24200107 | TRIML1 (+143699)                    | 4  | 189204296 |                              | Island                            | chr4:189203714-189204474  | Island     | NA                  | 1          | -0.1143206  | 0.00484425 | 0.00658046 | -0.1422126                         | -0.0028945                         | -0.0117483                         | transient response hypomethylation |                                    |
| cg17676428 | TOLLIP (+16849), MUC5B (+69748)     | 11 | 1314042   | TOLLIP                       | Body                              | chr11:1315467-1317115     | N_Shore    | NA                  | 0          | -0.2317528  | -0.1114635 | -0.083926  | -0.1440593                         | -0.1765289                         | -0.169519                          | constant hypomethylation           |                                    |
| cg04138591 | FOXK1 (-373947)                     | 7  | 4347982   |                              | Island                            | chr7:4347707-4348017      | Island     | NA                  | 0          | -0.3024692  | -0.2268826 | -0.1835983 | -0.1444321                         | -0.2971245                         | -0.3437743                         | constant hypomethylation           |                                    |
| cg10636760 | TT3CA (-198366), ACTRT2 (-33450)    | 1  | 2904595   |                              | NA                                | NA                        | 1          | -0.1245733          | 0.01128504 | 0.02114244  | -0.1447593 | -0.0365465 | -0.0345729                         | transient response hypomethylation |                                    |                                    |                                    |
| cg14476364 | EDEM3 (+274462), TSEN1 (+428768)    | 1  | 184449578 | C1orf21                      | Body                              | NA                        | 1          | -0.1116101          | -0.0353035 | -0.014847   | -0.1447747 | 0.01834257 | 0.01853397                         | transient response hypomethylation |                                    |                                    |                                    |
| cg17099445 | ENGASE (+7073), RBFOX3 (+400588)    | 17 | 77078091  | ENGASE                       | Body                              | Egr-1                     | 0          | -0.2493199          | 0.0480405  | 0.0679971   | -0.1462228 | -0.1432553 | -0.1077634                         | oscillatory response               |                                    |                                    |                                    |
| cg15491540 | ISM1 (-56868), SPTLC3 (+155923)     | 20 | 13145549  | SPTLC3                       | 3'UTR                             | NA                        | 0          | -0.102199           | -0.0063442 | -0.0180945  | -0.1465578 | -0.024919  | 0.0599062                          | oscillatory response               |                                    |                                    |                                    |
| cg26232417 | HNF4A (-1422)                       | 20 | 43028501  | HNF4A;HNF4                   | TSS1500;Body;TSS1500;Body;TSS1500 | NA                        | 0          | -0.1025577          | 0.09007677 | 0.06066088  | -0.1467064 | -0.0740333 | -0.092943                          | oscillatory response               |                                    |                                    |                                    |
| cg08194009 | KSR1 (-91607), WSR1 (+86323)        | 17 | 25707428  |                              | ELF1_(SC-631) CCN1                | 1                         | -0.1446632 | -0.1364068          | -0.0394462 | -0.1471775  | -0.1123327 | -0.1691295 | late response hypomethylation      |                                    |                                    |                                    |                                    |
| cg01616394 | NCOR2 (-86254), SCARB1 (+210255)    | 12 | 125138263 |                              | CEBPB                             | 1                         | -0.1077274 | -0.1003832          | -0.0473392 | -0.1472297  | -0.0599865 | -0.0882214 | late response hypomethylation      |                                    |                                    |                                    |                                    |
| cg05588496 | DOK6 (-562)                         | 18 | 67067721  | DOK6                         | TSS1500                           | chr18:67067509-67069168   | Island     | HA-E2F1 TAF1 PoI2   | NA         | 0           | -0.1381109 | 0.10478305 | 0.0664623                          | -0.1478009                         | -0.0140745                         | -0.0117939                         | oscillatory response               |
| cg00421815 | ARL15 (+260712), NDUFS4 (+489226)   | 5  | 53345690  | ARL15                        | Body                              | NA                        | 0          | -0.1893867          | 0.02122906 | 0.03228424  | -0.1492792 | 0.03353931 | -0.0293115                         | transient response hypomethylation |                                    |                                    |                                    |
| cg18687085 | ALPK2 (+228726), NEDD4L (+355853)   | 18 | 56067462  | NEDD4L                       | 3'UTR                             |                           |            |                     |            |             |            |            |                                    |                                    |                                    |                                    |                                    |

|            |                                     |    |           |                         |                           |         |                   |   |            |            |            |            |            |            |                                    |
|------------|-------------------------------------|----|-----------|-------------------------|---------------------------|---------|-------------------|---|------------|------------|------------|------------|------------|------------|------------------------------------|
| cg05372444 | UPK3B (+5928), POMZP3 (+110947)     | 7  | 76145672  | UPK3B;UPK3 3'UTR;3'UTR  | chr7:76145396-76145781    | Island  | HEY1              | 0 | -0.1143094 | -0.1286186 | 0.12537956 | -0.1534394 | -0.0710654 | -0.0061759 | oscillatory response               |
| cg01799418 | NONE                                | 3  | 117428927 |                         |                           |         | NA                | 0 | -0.1768691 | -0.0180526 | -0.0700015 | -0.1536574 | -0.0126785 | -0.0157735 | early response hypomethylation     |
| cg20931867 | PET112 (-2177)                      | 4  | 152684351 |                         | chr4:152682041-152682293  | S_Shelf | NA                | 0 | -0.1561998 | -0.0339002 | -0.0013443 | -0.1541588 | -0.0207969 | -0.0371909 | transient response hypomethylation |
| cg13226172 | CNTFR (+353)                        | 9  | 34589381  | CNTFR;CNTFI5'UTR;5'UTR  | chr9:34589113-34591978    | Island  | NA                | 0 | -0.1254988 | 0.10436919 | 0.01987859 | -0.1546774 | 0.00421586 | 0.01396054 | transient response hypomethylation |
| cg26561082 | ZMYND11 (+184430), DIP2C (+325244)  | 10 | 410363    | DIP2C Body              | chr10:409201-409523       | S_Shore | NA                | 0 | -0.1810535 | -0.177243  | -0.0406948 | -0.1549523 | -0.234016  | -0.2310612 | late response hypomethylation      |
| cg18083595 | USP29 (-847)                        | 19 | 57630661  | USP29 TSS1500           | chr19:57630339-57630633   | S_Shore | NA                | 0 | -0.1003153 | 0.07431412 | -0.0471683 | -0.155573  | 0.00642768 | -0.0198308 | transient response hypomethylation |
| cg04626565 | MAF (+1837)                         | 16 | 79632784  | MAF;MAF 1stExon;1stExon | chr16:79632619-79635537   | Island  | CTCF Rad21 CTCF_( | 1 | -0.1139743 | 0.01784518 | 0.00042793 | -0.1566539 | 0.03446431 | 0.04350472 | transient response hypomethylation |
| cg11512009 | THRA (+1627), NR1D1 (+36278)        | 17 | 38220694  | THRA;THRA 5'UTR;5'UTR   | chr17:38219084-38219880   | S_Shore | Sin3Ak-20 Max Pbx | 1 | -0.1179001 | -0.0162332 | 0.00832866 | -0.1623697 | -0.0294127 | -0.1516232 | oscillatory response               |
| cg17657037 | ITGB1BP3 (+756)                     | 19 | 3933856   | ITGB1BP3 Body           | chr19:3933473-3933816     | S_Shore | NA                | 0 | -0.1172539 | 0.10164032 | 0.01700443 | -0.1642339 | -0.0244702 | 0.01075868 | transient response hypomethylation |
| cg10614045 | DBX1 (-253)                         | 11 | 20182122  | DBX1 TSS1500            | chr11:20181200-20182325   | Island  | NA                | 1 | -0.1592359 | -0.0151248 | 0.0469448  | -0.1642979 | 0.0164946  | 0.02826881 | transient response hypomethylation |
| cg19537969 | EPYC (+40893)                       | 12 | 91357909  | EPYC 3'UTR              |                           |         | NA                | 0 | -0.1498271 | -0.0059724 | 0.00709343 | -0.1654326 | 0.10966063 | -0.1036467 | oscillatory response               |
| cg09540629 | UTF1 (-62018), KNDC1 (+7789)        | 10 | 134981759 | KNDC1 Body              | chr10:134980302-134981059 | S_Shore | NA                | 0 | -0.1460693 | 0.06206877 | 0.0413081  | -0.1808512 | -0.166216  | 0.01485811 | transient response hypomethylation |
| cg17983217 | DDAH2 (-185)                        | 6  | 31698223  | DDAH2 TSS200            | chr6:31695894-31698245    | Island  | PoI2-4H8 PoI2 TBP | 1 | -0.3192856 | -0.2173157 | -0.203754  | -0.1814438 | -0.29932   | -0.3218273 | constant hypomethylation           |
| cg08447739 | HTRA1 (-681)                        | 10 | 124220359 | HTRA1 TSS1500           | chr10:124220338-124222240 | Island  | NA                | 1 | -0.2159981 | -0.2676722 | -0.0368496 | -0.1822048 | -0.3418058 | -0.2887986 | late response hypomethylation      |
| cg06053651 | DNAJB13 (-995)                      | 11 | 73660368  | DNAJB13 TSS1500         |                           |         | NA                | 0 | -0.1129538 | -0.0455695 | 0.05155178 | -0.188301  | 0.01943193 | -0.1404175 | oscillatory response               |
| cg03713642 | HS3ST2 (-759)                       | 16 | 22825100  | HS3ST2 TSS1500          | chr16:22824616-22826459   | Island  | NA                | 1 | -0.16491   | 0.0147481  | -0.0541004 | -0.1956891 | -0.0042444 | -0.0325446 | early response hypomethylation     |
| cg07517282 | GAN (-53475), BCMO1 (+22800)        | 16 | 81295095  | BCMO1 Body              |                           |         | NA                | 0 | -0.1326593 | 0.05394687 | 0.06068568 | -0.1970266 | -0.1139914 | -0.069536  | oscillatory response               |
| cg19147129 | TET3 (-43139), DGUOK (+76358)       | 2  | 74230310  |                         | chr2:74229477-74229996    | S_Shore | NA                | 1 | -0.1469175 | 0.01064123 | 0.04519355 | -0.1991395 | 0.0084357  | -0.1048115 | oscillatory response               |
| cg14173033 | WDR45L (+61100), FOXK2 (+67717)     | 17 | 80545310  | FOXK2 Body              | chr17:80545433-80545658   | N_Shore | NA                | 1 | -0.1538752 | -0.0283978 | -0.0250096 | -0.2023679 | 0.02873981 | 0.04119221 | transient response hypomethylation |
| cg20104640 | ABRA (+106179), OXR1 (+216141)      | 8  | 107676292 | OXR1;OXR1 Body;Body     |                           |         | NA                | 0 | -0.2512685 | -0.2648285 | -0.1925902 | -0.2051379 | -0.2604451 | -0.3014269 | constant hypomethylation           |
| cg00003994 | MEOX2 (+445)                        | 7  | 15725862  | MEOX2 1stExon           |                           |         | NA                | 0 | -0.1278661 | 0.02362277 | -0.0952422 | -0.2290547 | 0.08081704 | 0.04834553 | oscillatory response               |
| cg15706807 | FAM110B (-800514), IMPAD1 (-200169) | 8  | 58106598  |                         |                           |         | NA                | 0 | -0.3161287 | -0.2864641 | -0.2903612 | -0.2428694 | -0.286256  | -0.3285706 | constant hypomethylation           |
| cg00984474 | FASTKD3 (+18227), ADCY2 (+454580)   | 5  | 7850922   | CSorf49 Body            | chr5:7850957-7851413      | N_Shore | NA                | 1 | -0.4977016 | -0.3669299 | -0.484895  | -0.3624148 | -0.4724401 | -0.4898058 | constant hypomethylation           |

**Supplementary Table 1. (B)** Replicated infection induced differentially methylated probes (IDMPs) at T4 in infected versus uninfected human macrophages.

| Methylation sites and annotation |                                      |                  |           |                           | Methylation level differences ( $\Delta\beta$ ) |                           |                             |                                              |                |                                                          |                                                          |                                                          | Differential methylation pattern |                                                          |                                                          |                                                          |
|----------------------------------|--------------------------------------|------------------|-----------|---------------------------|-------------------------------------------------|---------------------------|-----------------------------|----------------------------------------------|----------------|----------------------------------------------------------|----------------------------------------------------------|----------------------------------------------------------|----------------------------------|----------------------------------------------------------|----------------------------------------------------------|----------------------------------------------------------|
| Probe                            | Gene annotation using GREAT          | Chromosome (chr) | Position  | UCSC REFGENE NAME         | UCSC REFGENE GROUP                              | UCSC CPG ISLANDS NAME     | RELATION TO UCSC CPG ISLAND | Transcription Factor Binding Site Annotation | DHS Annotation | $\Delta\beta$ T2 infected versus uninfected Experiment 1 | $\Delta\beta$ T4 infected versus uninfected Experiment 1 | $\Delta\beta$ T1 infected versus uninfected Experiment 2 |                                  | $\Delta\beta$ T2 infected versus uninfected Experiment 2 | $\Delta\beta$ T3 infected versus uninfected Experiment 2 | $\Delta\beta$ T4 infected versus uninfected Experiment 2 |
| cg27512082                       | SKA2 (-90)                           | 17               | 57232889  | SKA2;PRR11;SKA2           | TSS200;TSS1500;TSS200                           | chr17:57231855-57232655   | S_Shore                     | HA-E2F1 NF-Y                                 | 1              | 0.329899302                                              | 0.27991136                                               | 0.0830382                                                | 0.08453494                       | 0.20980772                                               | 0.2038327                                                | constant hypermethylation                                |
| cg24860775                       | GABRA1 (-1646)                       | 5                | 161275745 | GABRA1                    |                                                 |                           |                             | NA                                           | 0              | -0.1143332                                               | 0.12250587                                               | 0.05054754                                               | 0.07972699                       | -0.0979078                                               | 0.19984782                                               | oscillatory response                                     |
| cg15718555                       | TWIST2 (+90825), HDAC4 (+475145)     | 2                | 239847497 |                           |                                                 |                           |                             | NA                                           | 0              | 0.00695561                                               | 0.15079315                                               | 0.00743458                                               | 0.06187061                       | -0.0195494                                               | 0.19406809                                               | oscillatory response                                     |
| cg12816057                       | ADRB2 (-171949), HTR4 (-17583)       | 5                | 148034206 | HTR4                      | TSS1500                                         | chr5:148033472-148034080  | S_Shore                     | PU.1                                         | 1              | 0.10604515                                               | 0.11194423                                               | -0.1518773                                               | 0.10233968                       | -0.0232675                                               | 0.1668183                                                | oscillatory response                                     |
| cg16430616                       | ASAP2 (-200)                         | 2                | 9346693   | ASAP2                     | TSS200                                          | chr2:93466383-9347944     |                             | HA-E2F1 AP-2                                 | 1              | -0.137199                                                | 0.10497647                                               | 0.07805858                                               | -0.0027916                       | -0.0238408                                               | 0.15255346                                               | oscillatory response                                     |
| cg0539449                        | CDH6 (+167374), DROSHA (+171146)     | 5                | 31361135  |                           |                                                 |                           |                             | NA                                           | 0              | -0.0122368                                               | 0.12011439                                               | 0.01144819                                               | 0.02579971                       | -0.0613251                                               | 0.15127931                                               | oscillatory response                                     |
| cg04094169                       | CADM3 (+517)                         | 1                | 159141893 | CADM3                     | Body                                            | chr1:159141202-159141718  | S_Shore                     | NRSF                                         | 1              | 0.05308585                                               | 0.11287346                                               | -0.0936982                                               | -0.0339985                       | -0.0598621                                               | 0.14084701                                               | oscillatory response                                     |
| cg10979880                       | BVES (-147)                          | 6                | 105584689 | BVES;BVES                 | TSS1500;TSS200                                  | chr6:105584148-105585621  | Island                      | CTCF TBP                                     | 1              | 0.02065229                                               | 0.10360739                                               | -0.0061428                                               | 0.0164302                        | -0.0183121                                               | 0.13955864                                               | late response hypermethylation                           |
| cg03613077                       | RG57 (-427)                          | 1                | 241520904 | RG57                      | TSS1500                                         | chr1:241520103-241520790  | S_Shore                     | NA                                           | 0              | -0.0251415                                               | 0.12305581                                               | -0.0903533                                               | -0.0367746                       | 0.02786859                                               | 0.13449663                                               | oscillatory response                                     |
| cg24909991                       | UNC5C (+4858), BMPR1B (+786375)      | 4                | 96465502  | UNC5C                     | Body                                            | chr4:96469456-96469667    | N_Shelf                     | NA                                           | 0              | -0.0111646                                               | 0.1010858                                                | 0.0501672                                                | 0.01570504                       | -0.0783523                                               | 0.13401105                                               | oscillatory response                                     |
| cg26313152                       | PNPLA6 (-797)                        | 19               | 7598793   | PNPLA6;MCOLN1             | TSS1500;3'UTR                                   | chr19:7598413-7601008     | Island                      | NA                                           | 0              | 0.11421283                                               | 0.13131061                                               | 0.0940138                                                | -0.0686498                       | -0.0454505                                               | 0.12635574                                               | oscillatory response                                     |
| cg03972398                       | HOXC13 (+604)                        | 12               | 54333179  | HOXC13                    | 1stExon                                         | chr12:54332805-54333731   | Island                      | NA                                           | 1              | -0.1255517                                               | 0.11864824                                               | -0.0589809                                               | -0.1060001                       | 0.04847834                                               | 0.12587368                                               | oscillatory response                                     |
| cg05022301                       | C14orf109 (-859), MOAP1 (+733)       | 14               | 77029308  | C1QTNF1;C1QTNF1;C1QTNF1   | 5'UTR;TSS1500;5'UTR                             | chr12:70759437-70761052   | Island                      | AP-2alpha AP-                                | 1              | -0.0044153                                               | 0.13850829                                               | -0.1253363                                               | -0.1005104                       | -0.0694942                                               | 0.12324242                                               | oscillatory response                                     |
| cg19721115                       | KCNMB4 (-396)                        | 12               | 70759665  | KCNMB4                    | TSS1500                                         | chr12:70759437-70761052   | Island                      | NA                                           | 1              | -0.0803165                                               | 0.12491303                                               | 0.00704675                                               | 0.11079362                       | -0.0094136                                               | 0.12081086                                               | oscillatory response                                     |
| cg26539042                       | ENGASE (-41710), C1QTNF1 (+9058)     | 17               | 93650515  | C14orf109;MOAP1;C14orf109 | TSS1500;Body;TSS1500                            | chr14:93650745-93651652   | N_Shore                     | NA                                           | 0              | 0.03308241                                               | 0.10725109                                               | 0.02542236                                               | 0.02228323                       | 0.09875105                                               | 0.12059459                                               | late response hypermethylation                           |
| cg10870083                       | LPHN3 (-294653)                      | 4                | 62068185  |                           |                                                 | chr4:62065883-62068801    | Island                      | NA                                           | 0              | 0.01818395                                               | 0.20950513                                               | -0.0516095                                               | 0.06964951                       | 0.03649045                                               | 0.12026422                                               | oscillatory response                                     |
| cg03375453                       | TBCEL (-177)                         | 11               | 120894635 | TBCEL                     | TSS200                                          | chr11:120894689-120895082 | N_Shore                     | ZNF263 EBF S                                 | 1              | -0.0247489                                               | 0.1653192                                                | -0.0728127                                               | 0.12772813                       | -0.020762                                                | 0.11512583                                               | oscillatory response                                     |
| cg18949192                       | TBX3 (-12312)                        | 12               | 115134280 |                           |                                                 | chr12:115135925-115136350 | N_Shore                     | SUZ12                                        | 0              | 0.03558175                                               | 0.13172402                                               | -0.006839                                                | 0.01588017                       | -0.075864                                                | 0.11310292                                               | oscillatory response                                     |
| cg10868030                       | SDHA (-25705), PLEKHG4B (+52278)     | 5                | 192650    | LRRIC14B                  | Body                                            | chr5:191792-192544        | S_Shore                     | NA                                           | 0              | 0.00458726                                               | 0.10130227                                               | -0.0172024                                               | -0.0394961                       | -0.0564491                                               | 0.11179775                                               | oscillatory response                                     |
| cg06284169                       | PAK2 (-250)                          | 3                | 196466477 | PAK2                      | TSS1500                                         | chr3:196466585-196467353  | N_Shore                     | HA-E2F1                                      | 0              | -0.0178399                                               | 0.21449352                                               | -0.0165399                                               | -0.0029459                       | 0.05438358                                               | 0.10911325                                               | late response hypermethylation                           |
| cg21823425                       | TMEM225 (-992)                       | 11               | 123757331 | TMEM225                   | TSS1500                                         |                           |                             | NA                                           | 0              | 0.09451731                                               | 0.12698698                                               | 0.06883531                                               | 0.0666017                        | 0.06886124                                               | 0.10859409                                               | constant hypermethylation                                |
| cg14041283                       | ADAMTSL1 (-567740), SH3GL2 (+327386) | 9                | 17906338  |                           |                                                 | chr9:17906419-17907488    | N_Shore                     | SUZ12                                        | 0              | -0.0710618                                               | 0.13827693                                               | 0.03122934                                               | -0.0421058                       | 0.03900526                                               | 0.10672337                                               | late response hypermethylation                           |
| cg2208176                        | IRX4 (+6711), NDUF56 (+74673)        | 5                | 1876168   |                           |                                                 | chr5:1874907-1879032      | Island                      | SUZ12                                        | 0              | -0.0822624                                               | 0.13215543                                               | -0.1015533                                               | 0.0608113                        | 0.04036602                                               | 0.10620995                                               | oscillatory response                                     |
| cg05252993                       | EZH2 (+43337), CUL1 (+141971)        | 7                | 148537903 | EZH2;EZH2                 | Body;Body                                       |                           |                             | NA                                           | 0              | -0.1113832                                               | 0.11693716                                               | 0.04819921                                               | 0.01202063                       | -0.0602311                                               | 0.10584812                                               | oscillatory response                                     |
| cg22396878                       | MAB21L2 (-405877), DCLK2 (+97774)    | 4                | 151097199 | DCLK2                     | Body                                            |                           |                             | NA                                           | 1              | 0.04303719                                               | 0.23458027                                               | 0.17304904                                               | -0.0346722                       | -0.0165556                                               | 0.10407058                                               | oscillatory response                                     |
| cg23056703                       | EDEM1 (+241430)                      | 3                | 5470788   |                           |                                                 |                           |                             | Pol2 GATA-1                                  | 1              | 0.03498786                                               | 0.10866992                                               | -0.0400255                                               | 0.04595075                       | 0.02266736                                               | 0.10382511                                               | late response hypermethylation                           |
| cg17459298                       | ADAMTS20 (-618)                      | 12               | 43946341  | ADAMTS20                  | TSS1500                                         | chr12:43944719-43946285   | S_Shore                     | NA                                           | 0              | 0.07491947                                               | 0.13151877                                               | -0.0103565                                               | -0.0288219                       | 0.03148102                                               | 0.10306119                                               | late response hypermethylation                           |
| cg05173737                       | SYT16 (+121465), KCNHS1 (+927949)    | 14               | 62584005  | FLJ43390                  | TSS200                                          | chr14:62583679-62584166   | Island                      | Max USF-1 Jui                                | 1              | -0.044541                                                | 0.12287126                                               | -0.0057436                                               | 0.02983678                       | 0.01959259                                               | 0.10250323                                               | late response hypermethylation                           |
| cg04124626                       | PLCXD3 (+795)                        | 5                | 41509934  | PLCXD3                    | Body                                            | chr5:41509783-41510166    | Island                      | NA                                           | 0              | 0.17758974                                               | 0.15359533                                               | 0.01740987                                               | 0.04872579                       | 0.05140834                                               | 0.10229097                                               | late response hypermethylation                           |
| cg00332146                       | CDHR2 (-441)                         | 5                | 175975901 | PCDH24                    | TSS1500                                         |                           |                             | NA                                           | 1              | -0.094941                                                | 0.13078127                                               | -0.0147358                                               | 0.00275407                       | -0.0345572                                               | 0.10150079                                               | late response hypermethylation                           |
| cg26673279                       | ROBO3 (+4127), ROBO4 (+28399)        | 11               | 124739431 | ROBO3                     | Body                                            | chr11:124738712-124739011 | S_Shore                     | NA                                           | 0              | 0.0451294                                                | 0.10920935                                               | -0.0266471                                               | -0.0294009                       | -0.0269588                                               | 0.10134066                                               | late response hypermethylation                           |
| cg20729747                       | HIST4H4 (-4019), H2AFJ (+814)        | 12               | 14928083  | H2AFJ;H2AFJ;H2AFJ         | 1stExon;Body;3'UTR                              | chr12:14927291-14928023   | S_Shore                     | Pol2                                         | 1              | -0.0447627                                               | -0.1256084                                               | -0.0715742                                               | -0.0842464                       | 0.01041293                                               | -0.1000106                                               | oscillatory response                                     |
| cg13309828                       | PCDHAC2 (-122482), ZMAT2 (+143233)   | 5                | 140223264 | PCDHAC2;PCDHAC2;PCDHAC1   | Body;Body;Body                                  | chr5:140221007-140221381  | S_Shore                     | NA                                           | 0              | -0.0222658                                               | -0.1192985                                               | 0.07000103                                               | 0.02313032                       | 0.04215879                                               | -0.1001241                                               | oscillatory response                                     |
| cg11666343                       | OTOS (-185881), GPC1 (-109161)       | 2                | 241265953 |                           |                                                 | chr2:241262311-241262759  | S_Shelf                     | NA                                           | 0              | -0.0002437                                               | -0.1122012                                               | -0.0318608                                               | 0.03129484                       | 0.04403248                                               | -0.1001553                                               | late response hypomethylation                            |
| cg13120108                       | HIF1A (-372081), PRKCH (+1523)       | 14               | 61790037  | PRKCH                     | Body                                            | chr14:61787880-61789467   | S_Shore                     | EBF                                          | 1              | 0.01568219                                               | -0.1312863                                               | 0.0258152                                                | 0.0354496                        | -0.3465488                                               | -0.1003453                                               | oscillatory response                                     |
| cg13073030                       | BCL11B (-28480), SETD3 (+180924)     | 4                | 99766301  |                           |                                                 |                           |                             | NA                                           | 0              | 0.04448395                                               | -0.1343296                                               | 0.01818454                                               | 0.0513997                        | 0.11929613                                               | -0.1003821                                               | oscillatory response                                     |
| cg24631834                       | NKX6-1 (+213675), AGPAT9 (+748055)   | 4                | 85205711  |                           |                                                 |                           |                             | NA                                           | 0              | 0.01247008                                               | -0.1074421                                               | 0.13111821                                               | -0.0001355                       | -0.1122748                                               | -0.1007978                                               | oscillatory response                                     |
| cg13683218                       | COL24A1 (-399)                       | 1                | 86622552  | COL24A1                   | TSS1500                                         | chr1:86621278-86622871    | Island                      | ZNF263 KAP1                                  | 1              | -0.1730739                                               | -0.1341252                                               | -0.0057613                                               | 0.00562983                       | 0.03092346                                               | -0.1008198                                               | late response hypomethylation                            |
| cg25889998                       | TUSC5 (+31995), YWHAE (+88604)       | 17               | 1214951   |                           |                                                 |                           |                             | NA                                           | 0              | 0.18149121                                               | -0.1400181                                               | -0.0102112                                               | -0.0725172                       | -0.0156183                                               | -0.10091                                                 | oscillatory response                                     |
| cg18465515                       | HIST1H3G (-1571), HIST1H2BI (-21)    | 6                | 26273182  | HIST1H2BI                 | TSS200                                          | chr6:26273290-26273557    | N_Shore                     | Pol2 TBP RFK                                 | 1              | 0.01329728                                               | -0.1589962                                               | -0.0543427                                               | -0.0293085                       | -0.0361021                                               | -0.1014236                                               | oscillatory response                                     |
| cg16333262                       | ESRRB (-219934), IFT43 (+165660)     | 14               | 76617755  | C14orf118                 | TSS1500                                         | chr14:76618138-76618452   | N_Shore                     | NA                                           | 0              | 0.02372747                                               | -0.1067817                                               | -0.011376                                                | -0.0766099                       | 0.12890216                                               | -0.1017792                                               | oscillatory response                                     |
| cg25304681                       | RPTN (-889)                          | 1                | 152132592 | RPTN                      | TSS1500                                         |                           |                             | NA                                           | 0              | 0.03251221                                               | -0.1496423                                               | 0.11332461                                               | 0.14029696                       | -0.0192584                                               | -0.1019798                                               | oscillatory response                                     |
| cg03995567                       | KCTD17 (+427)                        | 22               | 37448205  | KCTD17                    | Body                                            | chr22:37447689-37448238   | Island                      | YY1 [C-20] YY                                | 1              | -0.0718753                                               | -0.1526559                                               | 0.02179603                                               | 0.04467105                       | -0.0625466                                               | -0.1020888                                               | late response hypomethylation                            |
| cg20396423                       | EPN2 (-36)                           | 17               | 19140653  | EPN2                      | TSS200                                          | chr17:19140307-19141648   | Island                      | Egr-1 Pol2-4H                                | 1              | -0.1794208                                               | -0.2146498                                               | -0.0347484                                               | -0.0491212                       | -0.0919107                                               | -0.1022673                                               | late response hypomethylation                            |
| cg22811233                       | GREB1 (-50955), E2F6 (-16990)        | 2                | 11623286  |                           |                                                 | chr2:11622000-11623297    | Island                      | HA-E2F1 Pol2                                 | 1              | 0.19118591                                               | -0.2049233                                               | 0.00622291                                               | -0.001075                        | 0.0790094                                                | -0.1025275                                               | oscillatory response                                     |
| cg13916967                       | SOX6 (-210692), C11orf58 (-125043)   | 11               | 16635104  |                           |                                                 | chr11:16634957-16635969   | Island                      | SUZ12                                        | 0              | 0.01726811                                               | -0.116435                                                | 0.03058839                                               | 0.01632447                       | -0.027021                                                | -0.1032956                                               | late response hypomethylation                            |
| cg11374425                       | FEZF2 (-488)                         | 3                | 62359677  | FEZF2                     | TSS1500                                         | chr3:62357639-62359774    | Island                      | SUZ12                                        | 0              | -0.0677775                                               | -0.1164732                                               | -0.1457137                                               | -0.0425342                       | -0.027963                                                | -0.1034172                                               | oscillatory response                                     |
| cg05186793                       | KIAA1267 (+34751), STH (+158905)     | 17               | 44235520  | KIAA1267                  | Body                                            |                           |                             | NA                                           | 0              | 0.0460623                                                | -0.1097148                                               | 0.14861893                                               | -0.0184216                       | 0.01658084                                               | -0.1040174                                               | oscillatory response                                     |
| cg13204325                       | RIMBP2 (-165125), STX2 (+156224)     | 12               | 131167586 |                           |                                                 | chr12:131171168-131171548 | N_Shelf                     | NA                                           | 0              | 0.06947477                                               | -0.110212                                                | -0.0440245                                               | 0.14323967                       | 0.03241389                                               | -0.1044241                                               | oscillatory response                                     |
| cg26685539                       | VRK1 (+3443)                         | 14               | 97267126  | VRK1                      | 5'UTR                                           | chr14:97263595-97264274   | S_Shelf                     | NA                                           | 0              | -0.0085972                                               | -0.1134319                                               | 0.02662419                                               | 0.13311444                       | 0.110655                                                 | -0.1045305                                               | oscillatory response                                     |
| cg21654379                       | CCR4 (-128758), TRIM71 (+4798)       | 3                | 32864307  | TRIM71                    | Body                                            | chr3:32863174-32863415    | S_Shore                     | NA                                           | 0              | 0.04142464                                               | -0.1245782                                               | 0.04570289                                               | 0.05432832                       | 0.01360988                                               | -0.1052778                                               | oscillatory response                                     |
| cg23479949                       | GABRP (-281162), KCNMB1 (-112923)    | 5                | 169929560 | KCNIP1;KCNIP1             | TSS1500;Body                                    | chr5:169931065-169931471  | N_Shore                     | NA                                           | 0              | 0.00549028                                               | -0.1422166                                               | 0.00538794                                               |                                  |                                                          |                                                          |                                                          |





**Supplementary table S2. iDMPs by genomic feature**

|                                    | Total probes | Significant probes |        | Enrichment (95% CI) | P-value  |
|------------------------------------|--------------|--------------------|--------|---------------------|----------|
| All probes                         | 425496       | 388                | 425108 |                     |          |
| CpG island feature                 |              |                    |        |                     |          |
| Island                             | 136859       | 104                | 136755 | 0.83 (0.66 - 1.04)  | 1.03E-01 |
| Shore                              | 100342       | 124                | 100218 | 1.36 (1.10 - 1.66)  | 4.05E-03 |
| Shelf                              | 39420        | 35                 | 39385  | 0.97 (0.67 - 1.38)  | 1.00E+00 |
| Not island/shore/shelf             | 148875       | 125                | 148750 | 0.92 (0.75 - 1.13)  | 4.50E-01 |
| Gene feature                       |              |                    |        |                     |          |
| TSS1500                            | 75235        | 84                 | 75151  | 1.22 (0.96 - 1.55)  | 9.38E-02 |
| TSS200                             | 57412        | 41                 | 57371  | 0.78 (0.55 - 1.08)  | 1.56E-01 |
| 5' UTR                             | 125218       | 125                | 125093 | 1.09 (0.89 - 1.34)  | 3.71E-01 |
| 1st Exon                           | 35161        | 107                | 35054  | 3.34 (2.67 - 4.15)  | 1.11E-22 |
| Gene body                          | 156844       | 125                | 156719 | 0.87 (0.71 - 1.07)  | 1.96E-01 |
| 3' UTR                             | 17539        | 14                 | 17525  | 0.88 (0.47 - 1.49)  | 7.97E-01 |
| DNase I hypersensitivity sites     | 199995       | 173                | 199822 | 0.95 (0.79 - 1.14)  | 5.87E-01 |
| Transcription factor binding sites | 203540       | 171                | 203369 | 0.92 (0.76 - 1.11)  | 3.90E-01 |

**Supplementary Table 3. Comparison with publically available DNA methylation changes during infection with *M. tuberculosis*. Genes annotated to the iDMPs in *B. pseudomallei* and in *M. tuberculosis* infections**  
**Genes annotated to the iDMPs in *B. pseudomallei* and in *M. tuberculosis***

|              |                 | Differential methylation pattern in <i>B. pseudomallei</i> infection |           |           |                   |                                 | Differential methylation pattern in <i>M. tuberculosis</i> infection <sup>1</sup> |           |           |           |           |                   |           |
|--------------|-----------------|----------------------------------------------------------------------|-----------|-----------|-------------------|---------------------------------|-----------------------------------------------------------------------------------|-----------|-----------|-----------|-----------|-------------------|-----------|
| Hugo Gene ID | Ensembl Gene ID | Chromosome                                                           | Start     | End       | Distance from TSS | Direction                       | Chromosome                                                                        | Start     | End       | # of CpGs | Length bp | Distance from TSS | Direction |
| ABRA         | ENSG00000174429 | chr8                                                                 | 107676291 | 107676292 | (+106179)         | constant hypomethylation        | chr8                                                                              | 107823512 | 107823795 | 4         | 284       | 41179             | hypo      |
| IMPAD1       | ENSG00000104331 | chr8                                                                 | 58106597  | 58106598  | (-200169)         | constant hypomethylation        | chr8                                                                              | 58255707  | 58255727  | 3         | 21        | 349313            | hypo      |
| IRF8         | ENSG00000140968 | chr16                                                                | 85966236  | 85966237  | (+33464)          | constant hypomethylation        | chr16                                                                             | 86017636  | 86017715  | 4         | 80        | 85266             | hyper     |
| GMDS         | ENSG00000112699 | chr6                                                                 | 1616108   | 1616109   | (+629758)         | early response hypermethylation | chr6                                                                              | 1654600   | 1654713   | 3         | 114       | 30615             | hypo      |
|              |                 | chr6                                                                 |           |           |                   |                                 | chr6                                                                              | 2286018   | 2286209   | 3         | 192       | 40186             | hypo      |
|              |                 | chr6                                                                 |           |           |                   |                                 | chr6                                                                              | 2375802   | 2375895   | 7         | 94        | 129921            | hyper     |
|              |                 | chr5                                                                 |           |           |                   |                                 | chr5                                                                              | 140874572 | 140874742 | 7         | 171       | 5849              | hyper     |
| PCDHGC5      | ENSG00000240764 | chr5                                                                 | 140773538 | 140773539 | (-95268)          | early response hypermethylation | chr5                                                                              | 140874572 | 140874742 | 7         | 171       | 5849              | hyper     |
| PPP1R14C     | ENSG00000198729 | chr6                                                                 | 150547953 | 150547954 | (+83767)          | early response hypermethylation | chr6                                                                              | 150489390 | 150489400 | 4         | 11        | 25183             | hypo      |
| PTH1R        | ENSG00000160801 | chr3                                                                 | 46933807  | 46933808  | (+10070)          | early response hypermethylation | chr3                                                                              | 46940550  | 46940663  | 5         | 114       | 21370             | hypo      |
| ZFHX3        | ENSG00000140836 | chr16                                                                | 73098173  | 73098174  | (-15901)          | early response hypermethylation | chr16                                                                             | 72968586  | 72968803  | 8         | 218       | 151910            | hyper     |
|              |                 | chr16                                                                |           |           |                   |                                 | chr16                                                                             | 73045820  | 73045944  | 3         | 125       | 229098            | hyper     |
| PAX3         | ENSG00000135903 | chr2                                                                 | 223177573 | 223177574 | (-13860)          | early response hypomethylation  | chr2                                                                              | 223196957 | 223197049 | 4         | 93        | 33287             | hypo      |
| PCTP         | ENSG00000141179 | chr17                                                                | 53810812  | 53810813  | (-17526)          | early response hypomethylation  | chr17                                                                             | 53923046  | 53923053  | 4         | 8         | 94709             | hyper     |
| SPOCK2       | ENSG00000107742 | chr10                                                                | 73899797  | 73899798  | (-51268)          | early response hypomethylation  | chr10                                                                             | 73808050  | 73808087  | 4         | 38        | 40721             | hypo      |
|              |                 | chr10                                                                |           |           |                   |                                 | chr10                                                                             | 73793980  | 73794287  | 9         | 308       | 54656             | hypo      |
| CDHR2        | ENSG00000074276 | chr5                                                                 | 175975900 | 175975901 | (-441)            | late response hypermethylation  | chr5                                                                              | 175997165 | 175997305 | 3         | 141       | 27723             | hyper     |
| KCNH5        | ENSG00000140015 | chr14                                                                | 62584004  | 62584005  | (+927949)         | late response hypermethylation  | chr14                                                                             | 63178366  | 63178634  | 3         | 269       | 390254            | hypo      |
| SYT16        | ENSG00000139973 | chr14                                                                | 62584004  | 62584005  | (+121465)         | late response hypermethylation  | chr14                                                                             | 62361376  | 62361531  | 3         | 156       | 92348             | hypo      |
| CDC42BPA     | ENSG00000143776 | chr1                                                                 | 227163995 | 227163996 | (+341829)         | late response hypomethylation   | chr1                                                                              | 227447176 | 227447302 | 6         | 127       | 269673            | hypo      |
| CDKN1C       | ENSG00000129757 | chr11                                                                | 2890724   | 2890725   | (+16269)          | late response hypomethylation   | chr11                                                                             | 2872680   | 2872786   | 3         | 107       | 34377             | hypo      |
|              |                 | chr11                                                                |           |           |                   |                                 | chr11                                                                             | 2688467   | 2688525   | 4         | 59        | 218614            | hypo      |
| FOXP1        | ENSG00000114861 | chr3                                                                 | 70360571  | 70360572  | (+933743)         | late response hypomethylation   | chr3                                                                              | 71029827  | 71030284  | 6         | 458       | 26211             | hypo      |
| GABRP        | ENSG00000094755 | chr5                                                                 | 169929559 | 169929560 | (-281162)         | late response hypomethylation   | chr5                                                                              | 170171941 | 170171956 | 3         | 16        | 18404             | hypo      |
|              |                 | chr11                                                                | 2890724   | 2890725   | (+424505)         | late response hypomethylation   | chr11                                                                             | 2497906   | 2498009   | 3         | 104       | 32043             | hyper     |
| KCNQ1        | ENSG00000053918 | chr11                                                                | 2890724   | 2890725   | (+424505)         | late response hypomethylation   | chr11                                                                             | 2497906   | 2498009   | 3         | 104       | 32043             | hyper     |
| KCTD17       | ENSG00000100379 | chr22                                                                | 37448204  | 37448205  | (+427)            | late response hypomethylation   | chr22                                                                             | 37436891  | 37436981  | 3         | 91        | 10841             | hyper     |
| KSR1         | ENSG00000141068 | chr17                                                                | 25707427  | 25707428  | (-91607)          | late response hypomethylation   | chr17                                                                             | 25867805  | 25868018  | 5         | 214       | 84241             | hyper     |
| LRRC4C       | ENSG00000148948 | chr11                                                                | 40137954  | 40137955  | (+177708)         | late response hypomethylation   | chr11                                                                             | 40717157  | 40717351  | 3         | 195       | 581411            | hyper     |
|              |                 | chr11                                                                |           |           |                   |                                 | chr11                                                                             | 39354476  | 39354607  | 3         | 132       | 2126781           | hypo      |
| MANSC1       | ENSG00000111261 | chr12                                                                | 12518874  | 12518875  | (-15707)          | late response hypomethylation   | chr12                                                                             | 12486910  | 12487145  | 3         | 236       | 4829              | hypo      |
| MR1          | ENSG00000153029 | chr1                                                                 | 181128763 | 181128764 | (+126204)         | late response hypomethylation   | chr1                                                                              | 181012584 | 181012797 | 3         | 214       | 9623              | hypo      |
|              |                 | chr12                                                                | 125138262 | 125138263 | (-86254)          | late response hypomethylation   | chr12                                                                             | 125094113 | 125094228 | 4         | 116       | 42159             | hypo      |
| NCOR2        | ENSG00000196498 | chr12                                                                |           |           |                   |                                 | chr12                                                                             | 125101198 | 125101264 | 3         | 67        | 49220             | hyper     |
|              |                 | chr12                                                                |           |           |                   |                                 | chr12                                                                             | 125137761 | 125137796 | 5         | 36        | 85767             | hypo      |
|              |                 | chr12                                                                |           |           |                   |                                 | chr12                                                                             | 124959931 | 124960125 | 4         | 195       | 128889            | hypo      |
|              |                 | chr12                                                                |           |           |                   |                                 | chr12                                                                             | 125030049 | 125030131 | 5         | 83        | 198951            | hyper     |
| PAR6G        | ENSG00000178184 | chr18                                                                | 77905407  | 77905408  | (+99988)          | late response hypomethylation   | chr18                                                                             | 124817943 | 124817943 | 3         | 31        | 234081            | hyper     |
| PEX26        | ENSG00000215193 | chr22                                                                | 18531446  | 18531447  | (-29238)          | late response hypomethylation   | chr22                                                                             | 78015897  | 78016160  | 4         | 264       | 10598             | hyper     |
| RAC1         | ENSG00000136238 | chr7                                                                 | 6460965   | 6460966   | (+46841)          | late response hypomethylation   | chr22                                                                             | 18586766  | 18587005  | 5         | 240       | 26196             | hypo      |
|              |                 | chr7                                                                 |           |           |                   |                                 | chr7                                                                              | 6422909   | 6423020   | 3         | 112       | 8810              | hypo      |
| SCARB1       | ENSG00000073060 | chr12                                                                | 125138262 | 125138263 | (+210255)         | late response hypomethylation   | chr7                                                                              | 6427547   | 6427646   | 3         | 100       | 13442             | hypo      |
| SSTR5        | ENSG00000162009 | chr16                                                                | 1116360   | 1116361   | (-6394)           | late response hypomethylation   | chr12                                                                             | 125251184 | 125251208 | 3         | 25        | 97266             | hypo      |
| TNS3         | ENSG00000136205 | chr7                                                                 | 47780843  | 47780844  | (-159103)         | late response hypomethylation   | chr16                                                                             | 1080397   | 1080432   | 4         | 36        | 42340             | hypo      |
|              |                 | chr7                                                                 |           |           |                   |                                 | chr7                                                                              | 47493861  | 47493996  | 4         | 136       | 151363            | hyper     |
| ACTR3        | ENSG00000115091 | chr2                                                                 | 114644206 | 114644207 | (-3329)           | oscillatory response            | chr7                                                                              | 47583350  | 47583560  | 6         | 211       | 240890            | hypo      |
| AGAP1        | ENSG00000157985 | chr2                                                                 | 236839266 | 236839267 | (+436535)         | oscillatory response            | chr2                                                                              | 114769434 | 114769576 | 3         | 143       | 121968            | hyper     |
| ALPK2        | ENSG00000198796 | chr18                                                                | 56067461  | 56067462  | (+228726)         | oscillatory response            | chr2                                                                              | 236208765 | 236208773 | 3         | 9         | 193962            | hyper     |
|              |                 | chr18                                                                |           |           |                   |                                 | chr18                                                                             | 56217161  | 56217219  | 4         | 59        | 68711             | hyper     |



|          |                 |       |           |           |           |                      |       |           |           |    |     |        |       |
|----------|-----------------|-------|-----------|-----------|-----------|----------------------|-------|-----------|-----------|----|-----|--------|-------|
| AMPD3    | ENSG00000133805 | chr11 | 10473037  | 10473038  | (+815)    | oscillatory response | chr11 | 10336499  | 10336519  | 3  | 21  | 2707   | hyper |
|          |                 |       |           |           |           |                      | chr11 | 10383917  | 10384302  | 3  | 386 | 44891  | hyper |
| ANKMY1   | ENSG00000144504 | chr2  | 241392616 | 241392617 | (+104787) | oscillatory response | chr2  | 241504215 | 241504290 | 3  | 76  | 32759  | hypo  |
| ANOS     | ENSG00000171714 | chr11 | 22213802  | 22213803  | (-918)    | oscillatory response | chr11 | 22191262  | 22191541  | 3  | 280 | 23319  | hypo  |
| AUH      | ENSG00000148090 | chr9  | 93588841  | 93588842  | (+535363) | oscillatory response | chr9  | 93929129  | 93929351  | 4  | 223 | 194954 | hyper |
| BMPRI1B  | ENSG00000138696 | chr4  | 96465501  | 96465502  | (+786375) | oscillatory response | chr4  | 96060847  | 96060891  | 6  | 45  | 381750 | hyper |
| C1QTNF1  | ENSG00000173918 | chr17 | 77029307  | 77029308  | (+9058)   | oscillatory response | chr17 | 77034940  | 77035170  | 5  | 231 | 16159  | hypo  |
| CCR4     | ENSG00000183813 | chr3  | 32864306  | 32864307  | (-128758) | oscillatory response | chr3  | 33034083  | 33034475  | 7  | 393 | 41213  | hypo  |
| COG6     | ENSG00000133103 | chr13 | 41070899  | 41070900  | (+841137) | oscillatory response | chr13 | 40600338  | 40600585  | 5  | 248 | 370697 | hypo  |
| CYTH1    | ENSG00000108669 | chr17 | 76672155  | 76672156  | (+106219) | oscillatory response | chr17 | 76730931  | 76731264  | 5  | 334 | 60967  | hypo  |
| DIO3     | ENSG00000197406 | chr14 | 101520661 | 101520662 | (-507025) | oscillatory response | chr14 | 101908984 | 101909082 | 8  | 99  | 118653 | hypo  |
| DKK2     | ENSG00000155011 | chr4  | 107956954 | 107956955 | (+497)    | oscillatory response | chr4  | 107955060 | 107955076 | 3  | 17  | 109966 | hypo  |
| DMRT3    | ENSG00000064218 | chr9  | 995578    | 995579    | (+18616)  | oscillatory response | chr9  | 969337    | 969350    | 3  | 14  | 7619   | hyper |
| DNAH17   | ENSG00000187775 | chr17 | 76672155  | 76672156  | (-98681)  | oscillatory response | chr17 | 76439374  | 76439426  | 4  | 53  | 19622  | hypo  |
|          |                 | chr7  | 157658871 | 157658872 | (+529163) | oscillatory response | chr7  | 157103424 | 157103654 | 3  | 231 | 24534  | hypo  |
| DNAJB6   | ENSG00000105993 |       |           |           |           |                      | chr7  | 157089794 | 157089894 | 3  | 101 | 38229  | hypo  |
|          |                 |       |           |           |           |                      | chr7  | 157188998 | 157189053 | 5  | 56  | 60950  | hyper |
| DOCK10   | ENSG00000135905 | chr2  | 225907605 | 225907606 | (-277)    | oscillatory response | chr2  | 225902739 | 225903147 | 5  | 409 | 144678 | hypo  |
| DTNBP1   | ENSG00000047579 | chr6  | 15365073  | 15365074  | (+298214) | oscillatory response | chr6  | 15549755  | 15549833  | 4  | 79  | 26270  | hypo  |
| EHHADH   | ENSG00000113790 | chr3  | 184870892 | 184870893 | (+100992) | oscillatory response | chr3  | 184934163 | 184934268 | 3  | 106 | 25803  | hypo  |
| ESRRB    | ENSG00000119715 | chr14 | 76617754  | 76617755  | (-219934) | oscillatory response | chr14 | 76734564  | 76734651  | 5  | 88  | 42348  | hyper |
|          |                 |       |           |           |           |                      | chr14 | 76948653  | 76948822  | 3  | 170 | 171780 | hyper |
| EZH2     | ENSG00000106462 | chr7  | 148537902 | 148537903 | (+43537)  | oscillatory response | chr7  | 148579004 | 148579262 | 3  | 259 | 64004  | hyper |
| FOXO1    | ENSG00000150907 | chr13 | 41070899  | 41070900  | (-169833) | oscillatory response | chr13 | 41148152  | 41148449  | 4  | 298 | 18496  | hypo  |
|          |                 |       |           |           |           |                      | chr13 | 41193536  | 41193626  | 4  | 91  | 63777  | hypo  |
| GNPDA1   | ENSG00000113552 | chr5  | 141392794 | 141392795 | (-176)    | oscillatory response | chr5  | 141408154 | 141408394 | 6  | 241 | 15667  | hyper |
| IGF1R    | ENSG00000140443 | chr15 | 99385322  | 99385323  | (-192563) | oscillatory response | chr15 | 99446590  | 99446756  | 6  | 167 | 254473 | hypo  |
| IRX4     | ENSG00000113430 | chr5  | 1876167   | 1876168   | (+6711)   | oscillatory response | chr5  | 1912261   | 1912363   | 3  | 103 | 24961  | hypo  |
|          |                 |       |           |           |           |                      | chr5  | 1924636   | 1924841   | 5  | 206 | 37387  | hyper |
|          |                 | chr6  | 15365073  | 15365074  | (+118548) | oscillatory response | chr6  | 15167607  | 15167965  | 3  | 359 | 78739  | hypo  |
| JARID2   | ENSG00000008083 |       |           |           |           |                      | chr6  | 14938771  | 14939209  | 4  | 439 | 307535 | hyper |
|          |                 |       |           |           |           |                      | chr6  | 14875764  | 14876085  | 6  | 322 | 370601 | hypo  |
| KLF14    | ENSG00000174595 | chr7  | 130600074 | 130600075 | (-181188) | oscillatory response | chr7  | 130572190 | 130572336 | 6  | 147 | 153374 | hypo  |
| LIN28B   | ENSG00000187772 | chr6  | 105391856 | 105391857 | (-13065)  | oscillatory response | chr6  | 105421367 | 105421520 | 3  | 154 | 16520  | hyper |
| LOR      | ENSG00000203782 | chr1  | 153234267 | 153234268 | (+2090)   | oscillatory response | chr1  | 153235491 | 153235736 | 3  | 246 | 3437   | hypo  |
| MAP4K4   | ENSG00000071054 | chr2  | 102589888 | 102589889 | (+275725) | oscillatory response | chr2  | 102364910 | 102365077 | 4  | 168 | 51681  | hyper |
|          |                 |       |           |           |           |                      | chr2  | 102254700 | 102254767 | 3  | 68  | 58577  | hypo  |
|          |                 |       |           |           |           |                      | chr2  | 102246790 | 102247002 | 8  | 213 | 66414  | hypo  |
| MKLN1    | ENSG00000128585 | chr7  | 130600074 | 130600075 | (-412519) | oscillatory response | chr7  | 130716302 | 130716734 | 8  | 433 | 78335  | hypo  |
|          |                 |       |           |           |           |                      | chr7  | 130878860 | 130879328 | 4  | 469 | 84239  | hyper |
| MTRF1    | ENSG00000120662 | chr13 | 41837662  | 41837663  | (+49)     | oscillatory response | chr13 | 41837188  | 41837284  | 3  | 97  | 46022  | hyper |
| NEDD4L   | ENSG00000049759 | chr18 | 56067461  | 56067462  | (+355853) | oscillatory response | chr18 | 55988849  | 55988875  | 3  | 27  | 277263 | hypo  |
| OR2V2    | ENSG00000182613 | chr5  | 180597641 | 180597642 | (+15700)  | oscillatory response | chr5  | 180601738 | 180601754 | 3  | 17  | 19803  | hyper |
| PAWR     | ENSG00000177425 | chr12 | 79716681  | 79716682  | (+368107) | oscillatory response | chr12 | 79959674  | 79959730  | 6  | 57  | 125174 | hypo  |
| PGPEP1L  | ENSG00000183571 | chr15 | 99385322  | 99385323  | (+163561) | oscillatory response | chr15 | 99552368  | 99552384  | 3  | 17  | 1351   | hyper |
| PLEKHG4B | ENSG00000153404 | chr5  | 192649    | 192650    | (+52278)  | oscillatory response | chr5  | 12466     | 12483     | 6  | 18  | 127897 | hypo  |
| PMP22    | ENSG00000109099 | chr17 | 15164269  | 15164270  | (-178)    | oscillatory response | chr17 | 15174542  | 15174725  | 3  | 184 | 5989   | hypo  |
|          |                 |       |           |           |           |                      | chr17 | 15165657  | 15165670  | 4  | 14  | 31279  | hypo  |
| PRKCH    | ENSG00000027075 | chr14 | 61790036  | 61790037  | (+1523)   | oscillatory response | chr14 | 61657312  | 61657492  | 6  | 181 | 3125   | hypo  |
|          |                 |       |           |           |           |                      | chr14 | 61578052  | 61578144  | 11 | 93  | 76177  | hypo  |
| PRKCZ    | ENSG00000067606 | chr1  | 2125975   | 2125976   | (+144068) | oscillatory response | chr1  | 2077884   | 2077967   | 3  | 84  | 96016  | hyper |
| PTDSS1   | ENSG00000156471 | chr8  | 97270148  | 97270149  | (-4017)   | oscillatory response | chr8  | 97343908  | 97344017  | 4  | 110 | 70019  | hypo  |
| PTPRN2   | ENSG00000155093 | chr7  | 157658871 | 157658872 | (+721609) | oscillatory response | chr7  | 157550616 | 157550679 | 3  | 64  | 218897 | hyper |

|         |                 |       |           |           |           |                                     |       |           |           |    |     |        |       |
|---------|-----------------|-------|-----------|-----------|-----------|-------------------------------------|-------|-----------|-----------|----|-----|--------|-------|
| RFXAP   | ENSG00000133111 | chr13 | 37269128  | 37269129  | (-124209) | oscillatory response                | chr13 | 37394390  | 37394639  | 4  | 250 | 1153   | hypo  |
| RUFY1   | ENSG00000176783 | chr5  | 179002267 | 179002268 | (+24698)  | oscillatory response                | chr5  | 178980927 | 178980992 | 3  | 66  | 3400   | hyper |
| SEC61G  | ENSG00000132432 | chr7  | 54615863  | 54615864  | (+211074) | oscillatory response                | chr7  | 54856843  | 54857043  | 3  | 201 | 29275  | hypo  |
| SLC4A8  | ENSG00000050438 | chr12 | 51818680  | 51818681  | (+88)     | oscillatory response                | chr12 | 51792460  | 51792690  | 8  | 231 | 7474   | hypo  |
| SMAP1   | ENSG00000112305 | chr6  | 71605995  | 71605996  | (+228518) | oscillatory response                | chr6  | 71376516  | 71376649  | 5  | 134 | 895    | hyper |
| SORCS2  | ENSG00000184985 | chr4  | 7301175   | 7301176   | (+106803) | oscillatory response                | chr4  | 7298967   | 7299134   | 6  | 168 | 104785 | hyper |
|         |                 | chr4  |           |           |           |                                     | chr4  | 7628337   | 7628455   | 4  | 119 | 434131 | hypo  |
| SOX4    | ENSG00000124766 | chr4  |           |           |           |                                     | chr4  | 7697748   | 7698182   | 4  | 435 | 503700 | hyper |
|         |                 | chr6  | 21770732  | 21770733  | (+176762) | oscillatory response                | chr6  | 21438636  | 21438667  | 3  | 32  | 155319 | hypo  |
|         |                 | chr6  |           |           |           |                                     | chr6  | 21402797  | 21402890  | 4  | 94  | 191127 | hyper |
| SPATA19 | ENSG00000166118 | chr11 | 133800240 | 133800241 | (-84850)  | oscillatory response                | chr11 | 133617339 | 133617453 | 3  | 115 | 98036  | hypo  |
| SPATS2L | ENSG00000196141 | chr2  | 201171254 | 201171255 | (-100)    | oscillatory response                | chr2  | 201202770 | 201202973 | 3  | 204 | 32267  | hypo  |
| SVK     | ENSG00000165025 | chr9  | 93588841  | 93588842  | (+24831)  | oscillatory response                | chr9  | 93818861  | 93819105  | 4  | 245 | 254914 | hypo  |
| TBX3    | ENSG00000135111 | chr12 | 115134279 | 115134280 | (-12312)  | oscillatory response                | chr12 | 115129242 | 115129287 | 3  | 46  | 7294   | hyper |
| TEAD1   | ENSG00000187079 | chr11 | 12695903  | 12695904  | (-64)     | oscillatory response                | chr11 | 12916161  | 12916210  | 3  | 50  | 220216 | hypo  |
| TRIM27  | ENSG00000204713 | chr6  | 28584463  | 28584464  | (+307303) | oscillatory response                | chr6  | 28885706  | 28885898  | 3  | 193 | 15023  | hyper |
|         |                 | chr6  |           |           |           |                                     | chr6  | 28863663  | 28863725  | 6  | 63  | 28071  | hypo  |
| UNC5C   | ENSG00000182168 | chr4  | 96465501  | 96465502  | (+4858)   | oscillatory response                | chr4  | 96133793  | 96133847  | 3  | 55  | 50165  | hyper |
| UPK3B   | ENSG00000243566 | chr7  | 76145671  | 76145672  | (+5928)   | oscillatory response                | chr7  | 76608553  | 76608591  | 4  | 39  | 468827 | hypo  |
| VENTX   | ENSG00000151650 | chr10 | 135049207 | 135049208 | (-2199)   | oscillatory response                | chr10 | 135066730 | 135066839 | 3  | 110 | 15876  | hyper |
| VRK1    | ENSG00000100749 | chr14 | 97267125  | 97267126  | (+3443)   | oscillatory response                | chr14 | 97527858  | 97527936  | 3  | 79  | 264256 | hyper |
|         |                 | chr14 |           |           |           |                                     | chr14 | 97684742  | 97684839  | 4  | 98  | 421149 | hyper |
| YWHAE   | ENSG00000108953 | chr17 | 1214950   | 1214951   | (+88604)  | oscillatory response                | chr17 | 1258300   | 1258349   | 3  | 50  | 10758  | hypo  |
| ZFP42   | ENSG00000179059 | chr4  | 188427965 | 188427966 | (-488958) | oscillatory response                | chr4  | 188954042 | 188954058 | 4  | 17  | 37125  | hypo  |
| APBB1IP | ENSG00000077420 | chr10 | 26856453  | 26856454  | (+129189) | transient response hypermethylation | chr10 | 26791915  | 26792292  | 6  | 378 | 64971  | hyper |
| COL5A1  | ENSG00000130635 | chr9  | 137624092 | 137624093 | (+90442)  | transient response hypermethylation | chr9  | 137657888 | 137658030 | 3  | 143 | 124339 | hyper |
|         |                 | chr8  | 29206516  | 29206517  | (+1749)   | transient response hypermethylation | chr8  | 29240789  | 29241096  | 4  | 308 | 32756  | hyper |
| DUSP4   | ENSG00000120875 | chr8  |           |           |           |                                     | chr8  | 29294558  | 29294648  | 3  | 91  | 86417  | hyper |
|         |                 | chr8  |           |           |           |                                     | chr8  | 29357593  | 29357818  | 7  | 226 | 149519 | hypo  |
|         |                 | chr8  |           |           |           |                                     | chr8  | 29381283  | 29381602  | 6  | 320 | 173256 | hypo  |
|         |                 | chr19 | 10572361  | 10572362  | (+41691)  | transient response hypermethylation | chr19 | 10616221  | 10616236  | 4  | 16  | 1810   | hyper |
| KEAP1   | ENSG00000079999 | chr8  | 29206516  | 29206517  | (-85908)  | transient response hypermethylation | chr8  | 29028288  | 29028332  | 4  | 45  | 24935  | hypo  |
| KIF13B  | ENSG00000197892 | chr8  |           |           |           |                                     | chr8  | 28970095  | 28970313  | 3  | 219 | 150436 | hypo  |
| LAMA1   | ENSG00000101680 | chr18 | 6929789   | 6929790   | (+188022) | transient response hypermethylation | chr18 | 7138503   | 7138519   | 3  | 17  | 20697  | hyper |
| MDM1    | ENSG00000111554 | chr12 | 68729044  | 68729045  | (-2885)   | transient response hypermethylation | chr12 | 68763779  | 68763987  | 4  | 209 | 37721  | hypo  |
| MEF2C   | ENSG00000081189 | chr5  | 87985588  | 87985589  | (+214332) | transient response hypermethylation | chr5  | 88028895  | 88029125  | 3  | 231 | 14971  | hyper |
| NTRK3   | ENSG00000140538 | chr15 | 88420437  | 88420438  | (+379523) | transient response hypermethylation | chr15 | 88580558  | 88580724  | 3  | 167 | 162411 | hypo  |
| PDSS1   | ENSG00000148459 | chr10 | 26856453  | 26856454  | (-130140) | transient response hypermethylation | chr10 | 27025927  | 27026218  | 3  | 292 | 39484  | hypo  |
|         |                 | chr10 |           |           |           |                                     | chr10 | 27029189  | 27029488  | 3  | 300 | 42750  | hypo  |
| QRFPR   | ENSG00000186867 | chr4  | 122137695 | 122137696 | (+164484) | transient response hypermethylation | chr4  | 122282828 | 122283020 | 5  | 193 | 32455  | hypo  |
|         |                 | chr10 | 11317786  | 11317786  | (+257895) | transient response hypermethylation | chr10 | 11241680  | 11242283  | 8  | 604 | 194722 | hypo  |
| CELF2   | ENSG00000048740 | chr10 |           |           |           | hypermethylation                    | chr10 | 11318184  | 11318867  | 14 | 684 | 271266 | hypo  |
|         |                 | chr17 | 77644544  | 77644545  | (-165866) | transient response hypermethylation | chr17 | 77389312  | 77389320  | 3  | 9   | 302418 | hypo  |
| RFX3    | ENSG00000167281 | chr17 | 77078090  | 77078091  | (+400588) | hypermethylation                    |       |           |           |    |     |        |       |
|         |                 | chr17 |           |           |           | oscillatory response                |       |           |           |    |     |        |       |
| USP6NL  | ENSG00000148429 | chr10 | 11317786  | 11317787  | (+256486) | transient response hypermethylation | chr10 | 11625479  | 11625485  | 3  | 7   | 129537 | hyper |
|         |                 | chr10 | 11504218  | 11504219  | (+70054)  | hypermethylation                    | chr10 | 11423659  | 11423683  | 3  | 25  | 230081 | hypo  |
|         |                 | chr10 |           |           |           | oscillatory response                | chr10 | 11386849  | 11386921  | 7  | 73  | 266867 | hypo  |
| CRADD   | ENSG00000169372 | chr12 | 94244495  | 94244496  | (+173346) | transient response hypomethylation  | chr12 | 94018722  | 94019073  | 3  | 352 | 52252  | hypo  |
|         |                 | chr12 |           |           |           |                                     | chr12 | 94179109  | 94179216  | 4  | 108 | 108011 | hypo  |
| DDX39A  | ENSG00000123136 | chr19 | 14543882  | 14543883  | (-13689)  | transient response hypomethylation  | chr19 | 14532973  | 14533238  | 3  | 266 | 2925   | hypo  |

|        |                 |       |           |           |           |                                    |       |           |           |   |     |        |       |
|--------|-----------------|-------|-----------|-----------|-----------|------------------------------------|-------|-----------|-----------|---|-----|--------|-------|
| FERMT2 | ENSG00000073712 | chr14 | 53421043  | 53421044  | (-3230)   | transient response hypomethylation | chr14 | 53474193  | 53474327  | 3 | 135 | 55106  | hypo  |
| IRX5   | ENSG00000176842 | chr16 | 54352340  | 54352341  | (-612769) | transient response hypomethylation | chr16 | 55090476  | 55090512  | 3 | 37  | 125720 | hyper |
| LDB2   | ENSG00000169744 | chr4  | 16847843  | 16847844  | (+52579)  | transient response hypomethylation | chr4  | 16900733  | 16900813  | 3 | 81  | 340    | hypo  |
| LRAT   | ENSG00000121207 | chr4  | 155661848 | 155661849 | (-3313)   | transient response hypomethylation | chr4  | 155598911 | 155599008 | 3 | 98  | 50846  | hyper |
|        |                 |       |           |           |           |                                    | chr4  | 155599340 | 155599397 | 3 | 58  | 51255  | hyper |
| NKX6-2 | ENSG00000148826 | chr10 | 134738297 | 134738298 | (-138762) | transient response hypomethylation | chr10 | 134649562 | 134649602 | 3 | 41  | 50025  | hyper |
| PLXNC1 | ENSG00000136040 | chr12 | 94244495  | 94244496  | (-298002) | transient response hypomethylation | chr12 | 94602291  | 94602316  | 4 | 26  | 59804  | hypo  |
|        |                 |       |           |           |           |                                    | chr12 | 94656787  | 94656885  | 6 | 99  | 114337 | hypo  |
| PPM1L  | ENSG00000163590 | chr3  | 160569627 | 160569628 | (+95633)  | transient response hypomethylation | chr3  | 160518851 | 160519105 | 3 | 255 | 45588  | hypo  |
| SAMD4A | ENSG00000020577 | chr14 | 55034645  | 55034646  | (+317)    | transient response hypomethylation | chr14 | 55036376  | 55036470  | 3 | 95  | 2608   | hyper |
| TRIM2  | ENSG00000109654 | chr4  | 154075470 | 154075471 | (-50126)  | transient response hypomethylation | chr4  | 154028504 | 154028728 | 3 | 225 | 45027  | hyper |
| TTC34  | ENSG00000215912 | chr1  | 2904594   | 2904595   | (-198366) | transient response hypomethylation | chr1  | 2722280   | 2722321   | 3 | 42  | 4013   | hypo  |
|        |                 |       |           |           |           |                                    | chr1  | 2780762   | 2780836   | 4 | 75  | 62512  | hyper |
|        |                 |       |           |           |           |                                    | chr14 | 99541066  | 99541100  | 3 | 35  | 196777 | hyper |
| BCL11B | ENSG00000127152 | chr14 | 99738492  | 99738493  | (-672)    | transient response hypomethylation |       |           |           |   |     |        |       |
|        |                 | chr14 | 99766300  | 99766301  | (-28480)  | oscillatory response               |       |           |           |   |     |        |       |
|        |                 |       |           |           |           |                                    |       |           |           |   |     |        |       |
|        |                 |       |           |           |           |                                    |       |           |           |   |     |        |       |
|        |                 |       |           |           |           |                                    |       |           |           |   |     |        |       |
|        |                 |       |           |           |           |                                    |       |           |           |   |     |        |       |
|        |                 |       |           |           |           |                                    |       |           |           |   |     |        |       |
|        |                 |       |           |           |           |                                    |       |           |           |   |     |        |       |
| DBX1   | ENSG00000109851 | chr11 | 20182694  | 20182695  | (-826)    | transient response hypomethylation | chr11 | 20149888  | 20149961  | 3 | 74  | 32234  | hypo  |
|        |                 | chr11 | 20182121  | 20182122  | (-253)    | transient response hypomethylation |       |           |           |   |     |        |       |

<sup>1</sup> Pacis A, Tailleux L, Morin AM, Lambourne J, MacIsaac JL, et al. (2015) Bacterial infection remodels the DNA methylation landscape of human dendritic cells. Genome Res 25: 1801–1811.

**Supplementary Table 4. Comparison with publically available transcription data.** Genes annotated to conserved iDMPs in our study and differentially expressed in patients with septicemic melioidosis<sup>1</sup>

**The expression profiles of genes, which were modulated in the whole blood of patients with septicemic melioidosis (Pankla *et al.*)<sup>1</sup>**

| Gene annotation using GREAT | Chromosome | Location  | Distance from TSS | Differential methylation pattern    | Log fold-change | Fold-change p-value |
|-----------------------------|------------|-----------|-------------------|-------------------------------------|-----------------|---------------------|
| ABCE1                       | 4          | 145568306 | (-450849),        | transient response hypomethylation  | -1.8            | 0.000968            |
| ADCK3                       | 1          | 227163996 | (+36059),         | late response hypomethylation       | -1.3            | 0.000968            |
| ADRB2                       | 5          | 148034206 | (-171949),        | oscillatory response                | -1.4            | 0.00139             |
| AMPD3                       | 11         | 10473038  | (+815)            | oscillatory response                | 1.1             | 0.00495             |
| ANKMY1                      | 2          | 241392617 | (+104787)         | oscillatory response                | -1.2            | 0.00284             |
| BCL11B                      | 14         | 99766301  | (-28480),         | oscillatory response                | -2.7            | 0.000968            |
| BCL11B                      | 14         | 99738493  | (-672)            | transient response hypomethylation  | -2.7            | 0.000968            |
| C5orf28                     | 5          | 43480361  | (+3630)           | constant hypomethylation            | -1.3            | 0.00139             |
| CACNA1E                     | 1          | 181128764 | (-323921)         | late response hypomethylation       | 3.3             | 0.000968            |
| CACNA1E                     | 1          | 181767609 | (+314924)         | early response hypomethylation      | 3.3             | 0.000968            |
| CD44                        | 11         | 35158283  | (-2133)           | oscillatory response                | 0.9             | 0.0072              |
| CDKN1C                      | 11         | 2890725   | (+16269),         | late response hypomethylation       | -1.9            | 0.00284             |
| CHSY1                       | 15         | 101593341 | (+198795)         | oscillatory response                | 0.9             | 0.00411             |
| CIT                         | 12         | 120315669 | (-575)            | oscillatory response                | 1.1             | 0.00495             |
| DCAF13                      | 8          | 104426639 | (-302),           | late response hypomethylation       | -1.1            | 0.00869             |
| DDAH2                       | 6          | 31698223  | (-185)            | constant hypomethylation            | 2.4             | 0.000968            |
| DNAJC19                     | 3          | 181182210 | (-474649),        | transient response hypermethylation | -1.3            | 0.000968            |
| DOCK10                      | 2          | 225907606 | (-277)            | oscillatory response                | -1.4            | 0.000968            |
| DTNBP1                      | 6          | 15365074  | (+298214)         | oscillatory response                | 1.1             | 0.00342             |
| E2F6                        | 2          | 11623286  | (-16990)          | oscillatory response                | -1.1            | 0.00284             |
| ELF2                        | 4          | 140060774 | (-124)            | oscillatory response                | -1.6            | 0.000968            |
| FBN2                        | 5          | 127909589 | (-35855)          | transient response hypomethylation  | 1.3             | 0.00597             |
| FBXO31                      | 16         | 86715554  | (+701839)         | late response hypomethylation       | -1.5            | 0.000968            |
| FOXC1                       | 6          | 1616109   | (+5429),          | early response hypermethylation     | 1.7             | 0.0012              |
| GABPB2                      | 1          | 151040405 | (-2674)           | oscillatory response                | -1.3            | 0.000968            |
| GLMN                        | 1          | 92947035  | (-182470),        | transient response hypermethylation | -1.5            | 0.000968            |
| H2AFJ                       | 12         | 14928083  | (+814)            | oscillatory response                | 1.8             | 0.00104             |
| HDAC4                       | 2          | 239847497 | (+475145)         | oscillatory response                | 1.4             | 0.000968            |
| HIF1A                       | 14         | 61790037  | (-372081)         | oscillatory response                | 1.1             | 0.00342             |
| HLX                         | 1          | 221509763 | (+457021)         | transient response hypomethylation  | 1.2             | 0.00139             |
| HNRNPH1                     | 5          | 179002268 | (+48453)          | oscillatory response                | -0.9            | 0.00104             |
| IER3                        | 6          | 30761828  | (-49502)          | oscillatory response                | 1.8             | 0.00411             |
| IL18RAP                     | 2          | 103039542 | (+4289)           | oscillatory response                | 2.7             | 0.000968            |

|               |    |           |            |                                     |      |          |
|---------------|----|-----------|------------|-------------------------------------|------|----------|
| IL1R2         | 2  | 102589889 | (-18416),  | oscillatory response                | 3.5  | 0.00104  |
| IRF8          | 16 | 85966237  | (+33464)   | constant hypomethylation            | -1   | 0.00411  |
| KCTD17        | 22 | 37448205  | (+427)     | late response hypomethylation       | -1.5 | 0.00163  |
| MAEA          | 4  | 1336407   | (+52736)   | transient response hypomethylation  | 0.8  | 0.00597  |
| MAF           | 16 | 79632784  | (+1837)    | transient response hypomethylation  | -1.8 | 0.0012   |
| MANSC1        | 12 | 12518875  | (-15707),  | late response hypomethylation       | 1.6  | 0.00284  |
| MARCH1        | 4  | 165304473 | (-67)      | oscillatory response                | 1.5  | 0.000968 |
| MEF2C         | 5  | 87985589  | (+214332)  | transient response hypermethylation | -1.7 | 0.000968 |
| METTL7B       | 12 | 56075089  | (-240)     | early response hypomethylation      | 2.9  | 0.00163  |
| MIS18A        | 21 | 33248032  | (+403343)  | oscillatory response                | -1.2 | 0.0012   |
| MR1 (+126204) | 1  | 181128764 | (+126204)  | late response hypomethylation       | 1.3  | 0.00163  |
| MSRA          | 8  | 9760427   | (-151402), | transient response hypermethylation | 1.1  | 0.0012   |
| MTAP          | 9  | 21559551  | (-243083), | late response hypermethylation      | -1.7 | 0.00104  |
| MTERFD1       | 8  | 97270149  | (+3646)    | oscillatory response                | -1.3 | 0.000968 |
| NBEAL2        | 3  | 46933808  | (-87364),  | early response hypermethylation     | 1.4  | 0.000968 |
| NMUR1         | 2  | 232395269 | (-88)      | oscillatory response                | -1.4 | 0.00104  |
| NOV           | 8  | 120429518 | (+967)     | transient response hypomethylation  | -2.8 | 0.00342  |
| NTSE          | 6  | 85824196  | (-335105)  | late response hypomethylation       | -1.7 | 0.000968 |
| PASK          | 2  | 242051808 | (+37110),  | oscillatory response                | -2.4 | 0.000968 |
| PFKFB2        | 1  | 207226830 | (+211)     | oscillatory response                | 4.9  | 0.000968 |
| PKD2          | 4  | 88929658  | (+860)     | oscillatory response                | -1   | 0.00495  |
| PLXNC1        | 12 | 94244496  | (-298002), | transient response hypomethylation  | 1.3  | 0.000968 |
| PMP22         | 17 | 15164270  | (-178)     | oscillatory response                | -1.9 | 0.000968 |
| PNPLA6        | 19 | 7598793   | (-797)     | oscillatory response                | 1    | 0.00495  |
| PRKCH         | 14 | 61790037  | (+1523)    | oscillatory response                | -1.9 | 0.000968 |
| PTCH1         | 9  | 98271957  | (-1127)    | oscillatory response                | -1.7 | 0.00195  |
| PTGDR2        | 11 | 60621714  | (+1729),   | constant hypomethylation            | -2.2 | 0.00163  |
| PVRL3         | 3  | 110789788 | (-817)     | transient response hypomethylation  | -1.1 | 0.00139  |
| RFXAP         | 13 | 37269129  | (-124209), | oscillatory response                | -1.1 | 0.00104  |
| SCARB1        | 12 | 125138263 | (+210255)  | late response hypomethylation       | -1.3 | 0.00411  |
| SLC22A17      | 14 | 23821902  | (-243)     | transient response hypomethylation  | 3.4  | 0.000968 |
| SLC4A8        | 12 | 51818681  | (+88)      | oscillatory response                | -1.1 | 0.00139  |
| SMAGP         | 12 | 51664655  | (-454)     | early response hypermethylation     | -1   | 0.00869  |
| SPOCK2        | 10 | 73899798  | (-51268)   | early response hypomethylation      | -2.3 | 0.000968 |
| STK3          | 8  | 99951420  | (-113512), | oscillatory response                | 1.8  | 0.000968 |
| TNFSF8        | 9  | 117657237 | (+35637)   | late response hypomethylation       | -1.4 | 0.0072   |
| TOLLIP        | 11 | 1314042   | (+16849),  | constant hypomethylation            | 1.1  | 0.00139  |
| TRIM27        | 6  | 28584464  | (+307303)  | oscillatory response                | 0.9  | 0.00139  |
| VENTX         | 10 | 135049208 | (-2199)    | oscillatory response                | -1.1 | 0.0072   |
| WSB1          | 17 | 25707428  | (+86323)   | late response hypomethylation       | 1.8  | 0.00342  |
| ZDHC11        | 5  | 851101    | (-1)       | early response hypermethylation     | -1.2 | 0.00495  |
| ZFHX3         | 16 | 73098174  | (-15901)   | early response hypermethylation     | -1.3 | 0.00495  |

|         |    |         |            |                               |      |          |
|---------|----|---------|------------|-------------------------------|------|----------|
| ZMYND11 | 10 | 237794  | (+11861),  | oscillatory response          | -1.8 | 0.0012   |
| ZMYND11 | 10 | 410363  | (+184430), | late response hypomethylation | -1.8 | 0.0012   |
| ZNF559  | 19 | 9435206 | (+759)     | oscillatory response          | -1.4 | 0.000968 |

<sup>1</sup> Pankla R, Buddhisa S, Berry M, Blankenship DM, Bancroft GJ, et al. (2009) Genomic transcriptional profiling identifies a candidate blood biomarker signature for the diagnosis of septicemic melioidosis. *Genome Biol* 10: R127.
